# Supplementary material
Source: PubMed Central journal article supplement (PMC5495253)
Supplement: pnas.1702317114.sapp.pdf [file pnas.1702317114.sapp.pdf]

## Supporting Information

### Selective oxidation of aliphatic C-H bonds in alkylphenols by a chemomimetic biocatalytic system

Lei Du<sup>a,b,c,1</sup>, Sheng Dong<sup>a,b,1</sup>, Xingwang Zhang<sup>a,b</sup>, Chengying Jiang<sup>d,e</sup>, Jingfei Chen<sup>a,b</sup>, Lishan Yao<sup>a,b</sup>, Xiao Wang<sup>f</sup>, Xiaobo Wan<sup>f</sup>, Xi Liu<sup>g,h,i</sup>, Xinquan Wang<sup>g,h,i</sup>, Shaohua Huang<sup>a,b</sup>, Qiu Cui<sup>a,b</sup>, Yingang Feng<sup>a,b,2</sup>, Shuang-Jiang Liu<sup>d,e,2</sup>, and Shengying Li<sup>a,b,2</sup>

<sup>a</sup>Shandong Provincial Key Laboratory of Synthetic Biology, Qingdao Institute of Bioenergy and Bioprocess Technology, Chinese Academy of Sciences, Qingdao, Shandong 266101, China; <sup>b</sup>Key Laboratory of Biofuels, Qingdao Institute of Bioenergy and Bioprocess Technology, Chinese Academy of Sciences, Qingdao, Shandong 266101, China; <sup>c</sup>University of Chinese Academy of Sciences, Beijing 100049, China; <sup>d</sup>State Key Laboratory of Microbial Resources, Institute of Microbiology, Chinese Academy of Sciences, Beijing 100101, China; <sup>e</sup>Environmental Microbiology and Biotechnology Research Center, Institute of Microbiology, Chinese Academy of Sciences, Beijing 100101, China; <sup>f</sup>Key Laboratory of Bio-based Materials, Qingdao Institute of Bioenergy and Bioprocess Technology, Chinese Academy of Sciences, Qingdao, Shandong 266101, China; <sup>g</sup>Ministry of Education Key Laboratory of Protein Science, School of Life Sciences, Tsinghua University, Beijing 100084, China; <sup>h</sup>Beijing Advanced Innovation Center for Structural Biology, School of Life Sciences, Tsinghua University, Beijing 100084, China; and <sup>i</sup>Collaborative Innovation Center for Biotherapy, School of Life Sciences, Tsinghua University, Beijing 100084, China

<sup>1</sup>L.D. and S.D. contributed equally to this work.

<sup>2</sup>To whom correspondence should be addressed. E-mail: fengyg@qibebt.ac.cn (Y. Feng), liusj@im.ac.cn (S.-J. Liu), and lishengying@qibebt.ac.cn (S. Li)

## Table of Contents

|                  |    |
|------------------|----|
| SI Methods ..... | 3  |
| SI Tables.....   | 9  |
| SI Figures ..... | 13 |
| References ..... | 44 |

## SI Methods

**Strains and culture conditions.** The bacterial strains and plasmids used in this study are listed in Table S3. *Escherichia coli* strains were grown at 37 °C on LB agar (2% w/v) plates or LB liquid broth. *E. coli* DH5 $\alpha$  strain was used for vector construction and plasmid isolation. For protein expression and purification, *E. coli* BL21 (DE3) strain was cultured in Terrific Broth (TB) medium (1) with a rotary shaker (220 rpm). When required, kanamycin was added to a final concentration of 50  $\mu$ g/ml.

**DNA isolation and manipulation.** Plasmids were isolated using the E.Z.N.A.<sup>TM</sup> Plasmid Miniprep Kit (Omega Biotek, Norcross, GA). DNA fragments were purified using the Wizard SV Gel and PCR Clean-up System (Promega, Madison, USA). Vector transformation, agarose gel electrophoresis and other standard techniques of molecular cloning were performed as previously described (2).

**General protein expression, purification and concentration determination.** For protein expression, *E. coli* BL21 (DE3) carrying a specific expression vector was grown in LB broth containing 50  $\mu$ g/ml kanamycin at 37 °C overnight. Terrific Broth (1 l) supplemented with 4% glycerol was inoculated with a 1:100 dilution of the overnight culture. The culture was then incubated on a rotary shaker (220 rpm) at 37 °C until the OD<sub>600</sub> reached ~0.6. Next, IPTG (final concentration of 0.2 mM) was added into the culture to induce protein expression. Cultivation continued for additional 20 h at 18 °C.

Protein purification was carried out as described elsewhere (3) with minor modifications. All procedures were performed at 4 °C. The cells were harvested by centrifugation (5000  $\times$  g for 5 min), washed with deionized water for 2 times, and re-suspended in 50 ml of lysis buffer (50 mM NaH<sub>2</sub>PO<sub>4</sub>, 300 mM NaCl, 10% glycerol and 10 mM imidazole, pH 8.0). After sonication on ice, the crude cell lysate was centrifuged at 12,000  $\times$ g for 30 min to collect the supernatant fraction. Subsequently, 1 ml of Ni-NTA resin (Qiagen, Germany) was added into the supernatant with subsequent incubation at 4 °C on a gentle rotator for 30 min. This slurry was loaded onto an empty column, and washed with ~100 ml wash buffer (50 mM NaH<sub>2</sub>PO<sub>4</sub>, 300 mM NaCl, 10% glycerol and 20 mM imidazole, pH 8.0) until no proteins were detectable in flow-through by Coomassie Brilliant Blue G-250 assays. Approximately 10 ml of elution buffer (50 mM NaH<sub>2</sub>PO<sub>4</sub>, 300 mM NaCl, 10% glycerol and 250 mM imidazole, pH 8.0) was

used to elute target proteins from the Ni-NTA resin. The eluent was concentrated with an Amicon Ultra centrifugal filter (Merck KGaA, Darmstadt, Germany) ( $7500 \times g$  for 30 min) and buffer exchanged on a PD-10 column (GE Healthcare, Buckinghamshire, UK) with 5 ml desalting buffer (50 mM  $\text{NaH}_2\text{PO}_4$ , 10% glycerol, pH 7.5). The desalted enzyme solution was again concentrated to about 1 ml using Amicon Ultra centrifugal filter. The protein aliquots were flash frozen by liquid nitrogen and stored at  $-80\text{ }^\circ\text{C}$ .

Concentrations of non-P450 enzymes (CreH, CreI, CreE, CreF, CreD, CreG and CreC) were determined by the Bradford method using BSA as the standard (4). The concentration of P450 enzymes (wt and mutant CreJ enzymes) was determined according to the method described by Omura (5). Specifically, the CO-bound reduced difference spectrum was recorded by NanoDrop 2000 Spectrophotometer (Thermo Scientific). The concentration of functional P450 was calculated using the extinction coefficient ( $\epsilon_{450\text{ nm}-490\text{ nm}}$ ) of  $91000\text{ M}^{-1}\cdot\text{cm}^{-1}$ .

**Expression and purification of CreJ for crystallization procedures.** To facilitate heterologous expression of CreJ, the *creJ* gene with the first 84 nucleotides truncated was cloned into pET28a between *Bam*HI and *Hind*III restriction sites. The shortened protein containing an *N*-terminal His<sub>6</sub>-tag was expressed in *Escherichia coli* BL21 (DE3) and purified using a Ni<sup>2+</sup> Sepharose HP column (GE healthcare). The protein was further purified by anion exchange chromatography with a Q-sepharose column (GE healthcare) and gel filtration using a Superdex 75 column (GE healthcare). The gel filtration result indicates that the recombinant CreJ is monomeric in solution.

**CreJ mutagenesis and relative activity determination.** Mutation sites were introduced via PCR (Table S4). Specifically, complimentary primer pairs containing the mutated codon of interest were employed in PCR amplifications (35 cycles of  $95\text{ }^\circ\text{C}$  for 10 s,  $55\text{ }^\circ\text{C}$  for 15 s, and  $72\text{ }^\circ\text{C}$  for 2 min; FailSafe system from Epicentre) to yield a linear mutant plasmid from the original pET28a-*creJ* template DNA. Following gel purification, each linear mutant plasmid was treated with homologous recombinase (Hieff Clone TM One Step Cloning Kit, Yeasen, Shanghai, China) following vendor's protocols, followed by transformation into *E. coli* BL21(DE3). The incorporation of the mutated codon was confirmed via Sanger DNA sequencing (GENEWIZ, Suzhou, China).

Wild-type and mutant enzymatic activities were comparatively determined in reactions using **1'** as substrate, at 30 °C for 20 min. A standard reaction mixture contained 1 μM CreJ (or CreJ mutant), 1 μM CreE and 1 μM CreF, 1 mM substrate, and 4 mM NADPH in 100 μL of 50 mM Tris·HCl (pH 8.0). The substrate consumption ratio of each reaction was determined by high-performance liquid chromatography (HPLC). Relative enzymatic activity of each mutant was calculated by comparing substrate consumption ratios to that of CreJ, which was assigned 100% activity. All reactions were carried out in triplicate and the data was reported as the means ± SD.

**Substrate binding assays.** Spectroscopic substrate binding assays were carried out at room temperature by employing a UV visible spectrophotometer (Infinite M200 pro, TECAN) (6). Protein dissolved in 1 mL of 50 mM sodium phosphate buffer containing 10% glycerol (pH 7.4) at concentration of 1 μM was titrated with 100 mM stock solution of 4-cresol. The final concentration of substrate ranged from 0.2 to 0.8 mM. Data consisting of absorbance differences  $\Delta A$  ( $A_{390\text{ nm}} - A_{420\text{ nm}}$ ) and corresponding substrate concentration from duplicated experiments were plotted and fitted to the hyperbolic function  $\Delta A = A_{\text{max}} \cdot S / (K_D + S)$ , where  $S$  is the total substrate concentration,  $A_{\text{max}}$  is the maximal absorption shift at saturation, and  $K_D$  is the apparent dissociation constant for the enzyme-substrate complex.

**Chiral HPLC analysis of 2a and 7a.** The reaction sample was extracted with an equal volume of ethyl acetate. The organic phase was dried by nitrogen stream and re-constituted in an equal volume of methanol. The chiral column (250 × 4.6 mm) was manually packed with the chiral stationary phase, which was prepared by coating chitosan bis(3-chlorophenylcarbamate)-(cyclohexyl urea) on the surface of 3-aminopropyl silica gel according to a previously published method (7).

Chiral analysis was carried out on an Agilent 1260 infinity HPLC system (Agilent Technologies, USA) equipped with a DAD detector. The two enantiomers of **2a** and **7a** were respectively separated on the chiral column described above using an isocratic mobile phase of hexane containing 10% isopropanol over 60 min. The flow rate was set to 1 ml/min and injection volume was 10 μL. The detection wavelength was set to 275 nm. Optical configuration was determined via retention time comparison with the enantiomerically pure authentic standard.

**Sources of substrates and authentic standard compounds.** Except the phosphorylated compounds that were chemically synthesized (*see below*), all substrates and authentic standard compounds were purchased from different chemical suppliers. In details, **2** was bought from Tokyo Chemical Industry (TCI, Shanghai, China); **3**, **4b**, **6a**, **7b**, **11** and **12** from J&K Scientific Ltd. (Beijing, China); **4** from Acros Organics (Thermo Fisher Scientific, USA); **5**, **6** and **9** from AIKE REAGENT (Chengdu, China); **7** from Sigma-Aldrich (USA), **8** from Toronto Research Chemicals (TRC, Canada); **10** from Fluorochem (Derbyshire, UK), **5b** and racemic **2a** from Bide Pharmatech Ltd. (Shanghai, China); **5a** and the enantiomerically pure *S*-**2a** and *S*-**7a** from Enamine (Ukraine); **2b**, **3b**, **6b** and **6c** from Aladdin (Shanghai, China); racemic **7a** from Accela ChemBio (San Diego, CA, USA). **1'** was synthesized by following the chemical method with reference to the previous report (8).

**Chemical synthesis of 4-ethylphenyl phosphate (2').** Compound **2'** was synthesized through chemical methods with reference to previous reports by McKenna and Kenner (9, 10).

The reaction scheme is as follow:

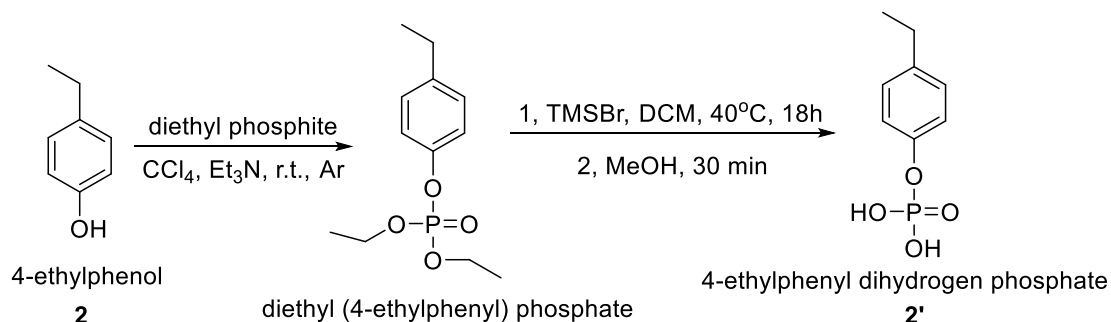

In details, to a solution of 4-ethylphenol (1.22 g, 10 mmol) dissolved in carbon tetrachloride (10 mL) was added diethyl phosphite (1.55 mL, 12 mmol) at  $0^\circ\text{C}$  under argon atmosphere. Triethylamine (1.65 mL, 12 mmol) was carefully added drop-wise to the mixture by using a dropping funnel. The mixture was stirred overnight at room temperature. Water (30 mL) was added and the organic layer was separated. The organic layer was washed twice with dilute hydrochloric acid ( $2 \times 15$  mL), four times with dilute sodium hydroxide solution ( $4 \times 15$  mL), and twice with brine ( $2 \times 15$  mL) before being dried over anhydrous  $\text{MgSO}_4$ . Removal of solvent on rotary evaporator gave a crude, which was further purified by silica gel column chromatography using a petroleum ether/ethyl acetate (4/1: v/v) mixture to afford diethyl (4-ethylphenyl) phosphate (2.51 g). Yield: 97 %.

Diethyl (4-ethylphenyl) phosphate (2.51 g, 9.7 mmol) was dissolved in dry CH<sub>2</sub>Cl<sub>2</sub> (50 mL). Then bromotrimethylsilane (12.8 mL, 10 equiv. to phosphate ester) was added to the solution and the mixture was heated to reflux for 18 h under argon atmosphere. The solvent was evaporated and the residue was dissolved in anhydrous methanol (50 mL). The solution was stirred for 30 min at 40 °C. Then the resulting solution was concentrated to give **2'** (1.8 g). Yield: 92%. Structure of synthetic **2'** was confirmed by HRMS (Fig. S42) and NMR (Fig. S43 and S44).

**Chemical synthesis of 1-hexanol phosphate (11') and 4-methyl cyclohexanol phosphate (12').** Compound **11'** was chemically synthesized using previously reported methods (11). The reaction scheme is as follow:

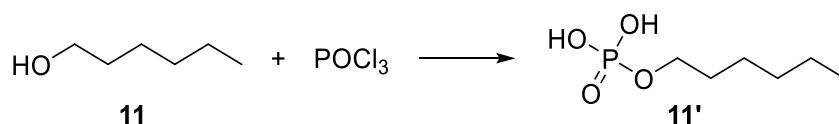

In details, **11'** was prepared by mixing **11** (5 mmol, 0.51 g) with the reagent phosphorus oxychloride (5 mmol, 0.77 g), by vigorous stirring for 1 h under aspirator vacuum to remove HCl (g), and then heated at 50 °C for 5 h. The reaction was quenched via a dropwise addition of the reaction mixture into excess cold water, and the resultant mixture was then stirred for 5 h at 30 °C. The product was extracted with Et<sub>2</sub>O multiple times. The combined extracts were dried with anhydrous MgSO<sub>4</sub>, and Et<sub>2</sub>O was removed under reduced pressure to afford a colorless oil 0.75 g (yield: 91 %).

Compound **12'** was accessed by following previously described methods (12). The reaction scheme is as follow:

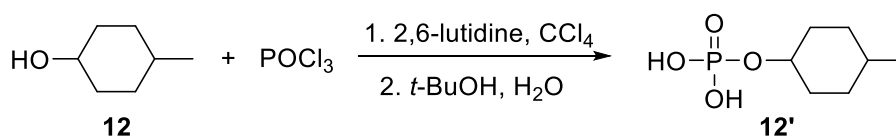

Specifically, **12** (5 mmol, 0.57 g) and 2,6-lutidine (5.5 mmol, 0.59 g) in carbon tetrachloride (2 ml) were added to phosphorous oxychloride (5mmol, 0.77 g) in carbon tetrachloride (10 ml) at 0-10 °C. After an hour, the product was filtered from base hydrochloride and evaporated, yielding the dichloridate as a colorless oil. 4-Methyl cyclohexyl phosphorodichloridate in carbon tetrachloride (5 ml) was treated with *tert*-butyl

alcohol (0.85 g) and water (0.1 ml) for 30 min at 50 °C. Removal of the solvent left an oil which was dissolved in 30 ml water, and extracted with Et<sub>2</sub>O several times. The combined extracts were dried with anhydrous MgSO<sub>4</sub>, and Et<sub>2</sub>O was removed *en vacuo* to give 0.3 g of a white solid (yield: 31 %). The chemical structures of synthetic **11'** and **12'** were confirmed by HRMS (Fig. S29 and S30) and NMR (Fig. S45-S48).



## SI Tables

**Table S1. Data collection and refinement statistics for CreJ structures.**

| Parameter                             | CreJ-1'                | CreJ-2'                |
|---------------------------------------|------------------------|------------------------|
| <b>Data collection <sup>a</sup></b>   |                        |                        |
| Space group                           | C 1 2 1                | P 43 21 2              |
| <i>a, b, c</i> (Å)                    | 125.54, 121.14, 125.61 | 86.07, 86.07, 125.04   |
| $\alpha, \beta, \gamma$               | 90.0, 90.96, 90.0      | 90.0, 90.0, 90.0       |
| Wavelength                            | 0.979                  | 0.979                  |
| Resolution (Å)                        | 34.56-2.0 (2.03-2.0)   | 35.45-1.70 (1.73-1.70) |
| Total reflections                     | 454625 (17470)         | 687298 (36247)         |
| Unique reflections                    | 125653 (5928)          | 52282 (2731)           |
| Completeness (%)                      | 99.3 (94.4)            | 99.8 (100.0)           |
| Multiplicity                          | 3.6 (2.9)              | 13.1 (13.3)            |
| <i>Mean I/sigma (I)</i>               | 8.5 (2.1)              | 20.1 (5.6)             |
| $R_{\text{merge}}^b$                  | 0.106 (0.516)          | 0.091 (0.505)          |
| <b>Refinement</b>                     |                        |                        |
| $R_{\text{work}}/R_{\text{free}}$ (%) | 16.08/19.79            | 18.15/20.88            |
| <b>No. atoms</b>                      |                        |                        |
| Protein                               | 12765                  | 3252                   |
| Ligands                               | 255                    | 56                     |
| water                                 | 1825                   | 552                    |
| <b>B-factors</b>                      |                        |                        |
| Average B-factor                      | 34.00                  | 24.20                  |
| Proteins                              | 33.70                  | 22.40                  |
| Ligands                               | 23.80                  | 11.20                  |
| Solvent                               | 38.10                  | 35.80                  |
| <b>r.m.s.d.</b>                       |                        |                        |
| Bond length (Å)                       | 0.01                   | 0.006                  |
| Bond angles                           | 1.22                   | 1.15                   |
| <b>Ramachandran statistics</b>        |                        |                        |
| Favored (%)                           | 97                     | 97                     |
| Outliers (%)                          | 0.06                   | 0                      |

<sup>a</sup> Numbers in parentheses refer to data in the highest-resolution shell.

<sup>b</sup>  $R_{\text{merge}} = \frac{\sum_{hkl} \sum_i |I(hkl)_i - \langle I(hkl) \rangle|}{\sum_{hkl} \sum_i \langle I(hkl) \rangle}$ , where  $I$  is the observed intensity,  $\langle I(hkl) \rangle$  represents the average intensity, and  $I(hkl)_i$  represents the observed intensity of each unique reflection.

**Table S2. Reactivity of CreHI, CreJEF and CreD towards different alkylphenols (1-10).**

| Alkylphenol                   | CreHI <sup>a</sup> | CreHI + CreJEF <sup>b</sup> | CreHI + CreJEF + CreD <sup>c</sup> |
|-------------------------------|--------------------|-----------------------------|------------------------------------|
| <i>p</i> -cresol (1)          | +                  | +                           | +                                  |
| <i>p</i> -ethylphenol (2)     | +                  | +                           | +                                  |
| <i>p</i> -vinylphenol (3)     | +                  | +                           | +                                  |
| <i>p</i> -propylphenol (4)    | +                  | +                           | +                                  |
| <i>p</i> -isopropylphenol (5) | +                  | +                           | +                                  |
| <i>m</i> -cresol (6)          | +                  | +                           | +                                  |
| <i>m</i> -ethylphenol (7)     | +                  | +                           | +                                  |
| <i>m</i> -vinylphenol (8)     | +                  | -                           | +                                  |
| <i>o</i> -cresol (9)          | +                  | -                           | +                                  |
| <i>o</i> -ethylphenol (10)    | -                  | -                           | -                                  |

<sup>a</sup>Each alkylphenol (1 mM) was phosphorylated by CreHI (10  $\mu$ M for each enzyme), in the presence of 20 mM MgCl<sub>2</sub>, 2 mM MnCl<sub>2</sub>, and 2 mM ATP, at 30 °C for 2 h;

<sup>b</sup>Following the first stage of phosphorylation by CreHI<sup>a</sup>, CreJEF (10  $\mu$ M for each protein) and 2 mM NADPH were added at 30 °C for 2 h;

<sup>c</sup>Following the reactions catalyzed by CreHI<sup>a</sup> and CreJEF<sup>b</sup>, CreD (10  $\mu$ M) was added at 30 °C for 2 h;

“+” represents that substrate consumption or product formation was detected;

“-” represents neither substrate consumption nor product formation was detected.

**Table S3. Strains and plasmids used in this study.**

| Strain, plasmid             | Genotype/Phenotype                       | Source                     |
|-----------------------------|------------------------------------------|----------------------------|
| <i>E. coli</i> BL21(DE3)    |                                          | Novagen                    |
| <i>E. coli</i> DH5 $\alpha$ |                                          | Invitrogen                 |
| pET28b                      | Expression vector                        | Novagen                    |
| pET28b- <i>creC</i>         | Expression vector of CreC                | Du L, <i>et al.</i> , 2016 |
| pET28a- <i>creD</i>         | Expression vector of CreD                | Li T, <i>et al.</i> , 2014 |
| pET28a- <i>creE</i>         | Expression vector of CreE                | Li T, <i>et al.</i> , 2014 |
| pET28a- <i>creF</i>         | Expression vector of CreF                | Du L, <i>et al.</i> , 2016 |
| pET28a- <i>creG</i>         | Expression vector of CreG                | Li T, <i>et al.</i> , 2014 |
| pET28b- <i>creH</i>         | Expression vector of CreH                | Du L, <i>et al.</i> , 2016 |
| pET28b- <i>creI</i>         | Expression vector of CreI                | Du L, <i>et al.</i> , 2016 |
| pET28a- <i>creJ</i>         | Expression vector of CreJ                | Li T, <i>et al.</i> , 2014 |
| pET28a- <i>creJ</i> -Q83A   | Expression vector of CreJ-mutant (Q83A)  | Present study              |
| pET28a- <i>creJ</i> -S106A  | Expression vector of CreJ-mutant (S106A) | Present study              |
| pET28a- <i>creJ</i> -S109A  | Expression vector of CreJ-mutant (S109A) | Present study              |
| pET28a- <i>creJ</i> -R194A  | Expression vector of CreJ-mutant (R194A) | Present study              |
| pET28a- <i>creJ</i> -R194K  | Expression vector of CreJ-mutant (R194K) | Present study              |
| pET28a- <i>creJ</i> -R194E  | Expression vector of CreJ-mutant (R194E) | Present study              |
| pET28a- <i>creJ</i> -S261A  | Expression vector of CreJ-mutant (S261A) | Present study              |
| pET28a- <i>creJ</i> -W199A  | Expression vector of CreJ-mutant (W199A) | Present study              |
| pET28a- <i>creJ</i> -F264A  | Expression vector of CreJ-mutant (F264A) | Present study              |
| pET28a- <i>creJ</i> -I312A  | Expression vector of CreJ-mutant (I312A) | Present study              |
| pET28a- <i>creJ</i> -W315A  | Expression vector of CreJ-mutant (W315A) | Present study              |
| pET28a- <i>creJ</i> -F416A  | Expression vector of CreJ-mutant (F416A) | Present study              |

**Table S4. Primers used for mutagenesis of CreJ.**

| Mutant | Primer  | Sequence                            |
|--------|---------|-------------------------------------|
| Q83A   | Q83A-F  | AAATGCAG <b>C</b> AGCCCCAGTCCGCAAG  |
|        | Q83A-R  | CTGGGGCT <b>G</b> CTGCATTTTCAGAGGA  |
| S106A  | S106A-F | TGCATAC <b>G</b> CAGGATTATCAGCTCGT  |
|        | S106A-R | ATAATCCT <b>G</b> CGTATGCAGTGAAGCC  |
| S109A  | S109A-F | CGGATTAG <b>C</b> AGCTCGTATTCCACCA  |
|        | S109A-R | TACGAGCT <b>G</b> CTAATCCGGAGTATGC  |
| R194A  | R194A-F | AGATTCC <b>G</b> CAGCGGCCATGACCTGG  |
|        | R194A-R | TGGCCGCT <b>G</b> CGGAATCTGACCACCG  |
| R194K  | R194K-F | AGATTCC <b>A</b> AAGCGGCCATGACCTGG  |
|        | R194K-R | TGGCCGCT <b>T</b> TGGAATCTGACCACCG  |
| R194E  | R194E-F | AGATTCC <b>G</b> AAGCGGCCATGACCTGG  |
|        | R194E-R | TGGCCGCT <b>T</b> CGGAATCTGACCACCG  |
| S261A  | S261A-F | GCTGTAC <b>G</b> CACTGCTTTTTGCGGGG  |
|        | S261A-R | AAAGCAGT <b>G</b> CGTACAGCAAAGAAGC  |
| W199A  | W199A-F | CATGACC <b>G</b> CAGGCGATCTTAGTGAT  |
|        | W199A-R | GATCGCCT <b>G</b> CGGTCATGGCCGCACG  |
| F264A  | F264A-F | CCTGCTT <b>G</b> CAGCGGGGCACGAAACA  |
|        | F264A-R | GCCCCGCT <b>G</b> CAAGCAGGGAGTACAG  |
| I312A  | I312A-F | CGGCTCG <b>G</b> CAGTGGGGTGGCGTCGA  |
|        | I312A-R | ACCCCACT <b>G</b> CCGAGCCGGAGTACCG  |
| W315A  | W315A-F | CGTGGGG <b>G</b> CACGTTCGAAAAGCATTA |
|        | W315A-R | TTCGACGT <b>G</b> CCCCCACGATCGAGCC  |
| F416A  | F416A-F | CCTCTCC <b>G</b> CACGCGTCCCCACTTCT  |
|        | F416A-R | GGACGCGT <b>G</b> CGGAGAGGTTCTCCCG  |

Nucleotides in bold represent the mutated codons.

SI Figures

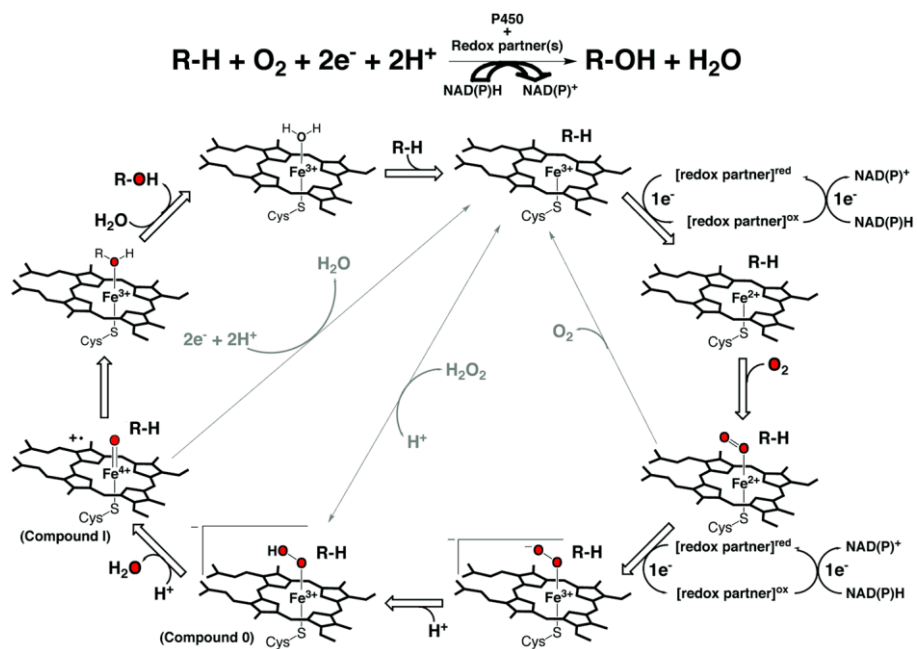

Fig. S1. The P450 catalytic cycle. (Adapted from the previous publication (13))

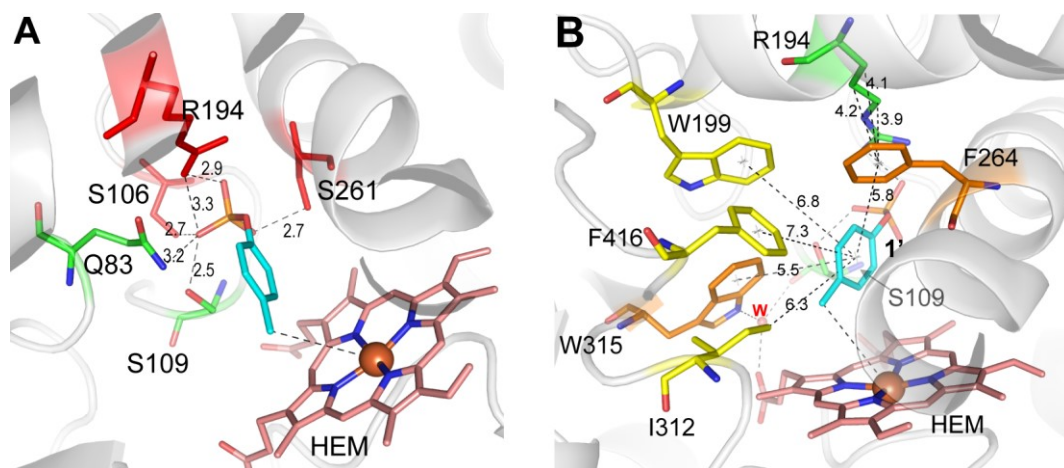

Fig. S2. Steric positions of the residues interacting with the phosphate group (A) and benzyl moiety (B) of 4-cresol.

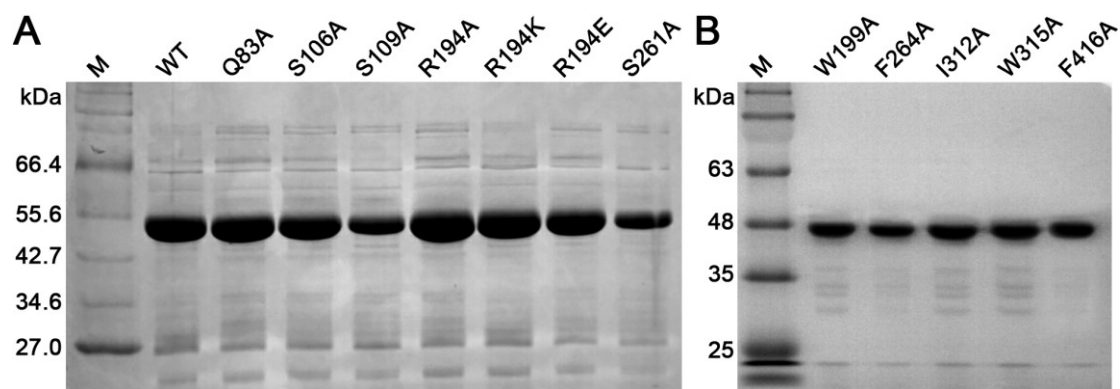

**Fig. S3. SDS-PAGE analysis of purified wild-type and mutant CreJ enzymes.** (A) Mutants of the residues interacting with the phosphate group of substrate. (B) Mutants of the residues surrounding the benzyl moiety of substrate. M, protein marker.

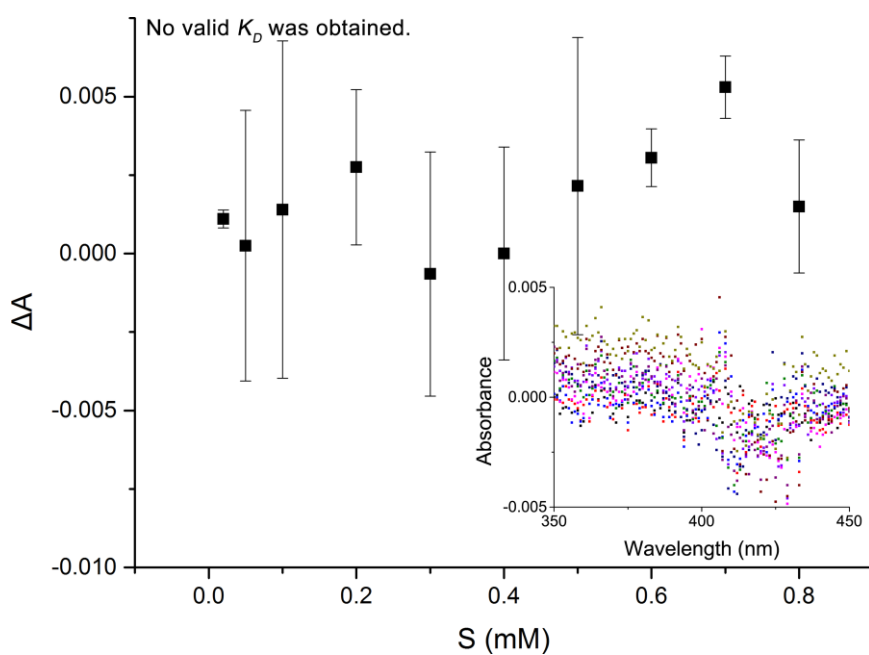

**Fig. S4. The binding curve of 4-cresol to the R194A mutant.**

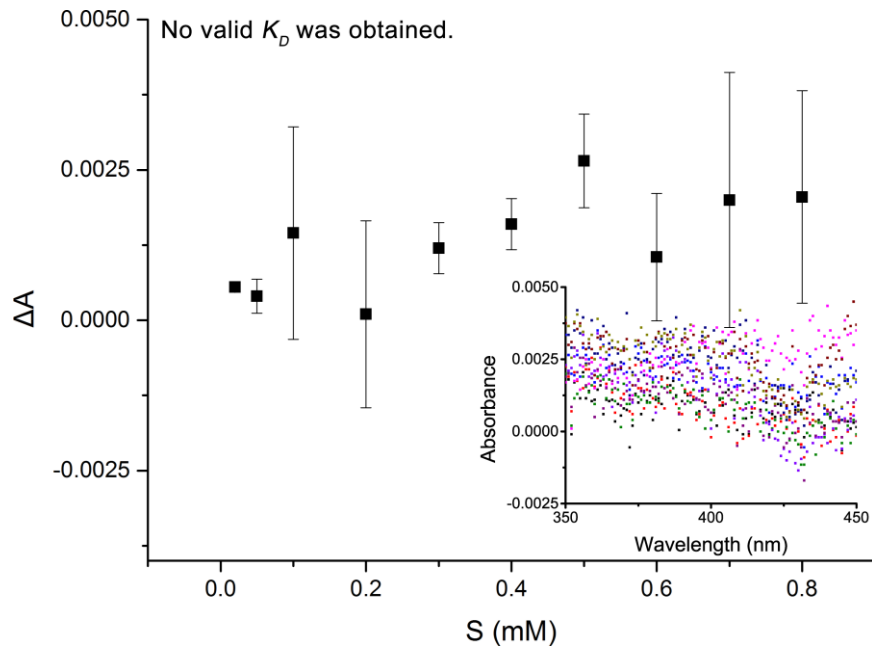

**Fig. S5. The binding curve of 4-cresol to the R194K mutant.**

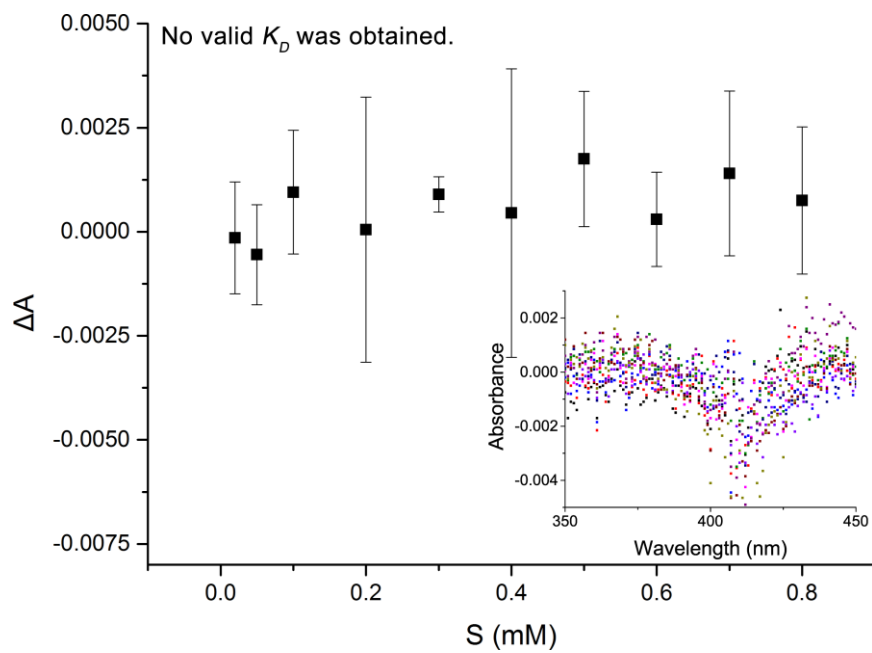

**Fig. S6. The binding curve of 4-cresol to the R194E mutant.**

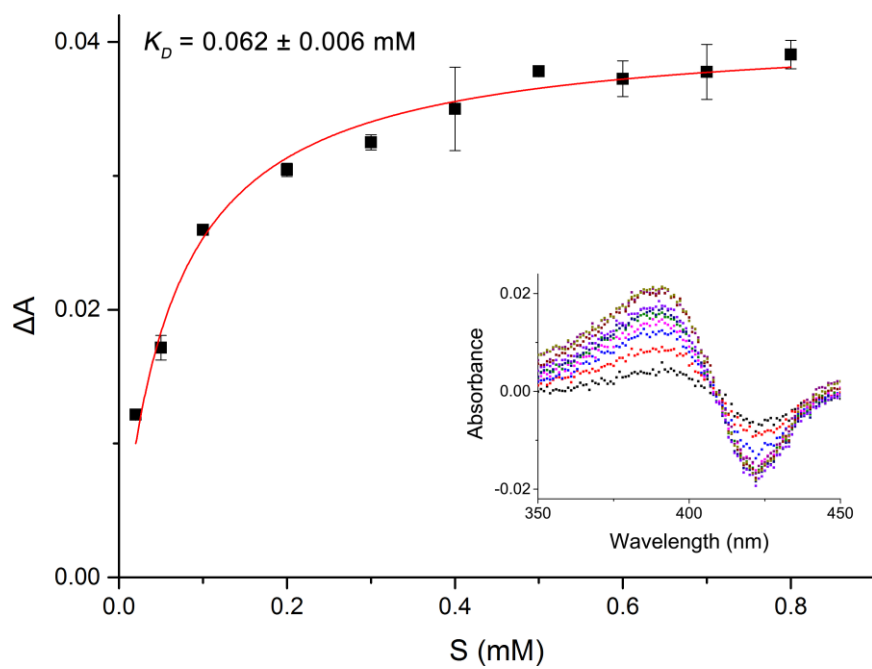

**Fig. S7. The binding curve of 4-cresol to wild-type CreJ.**

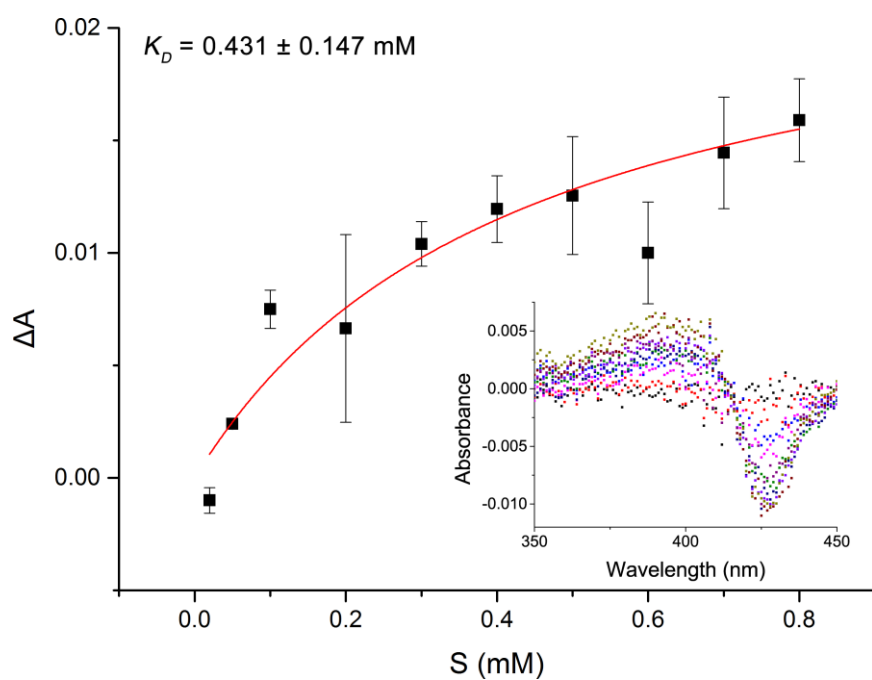

**Fig. S8. The binding curve of 4-cresol to the S106A mutant.**



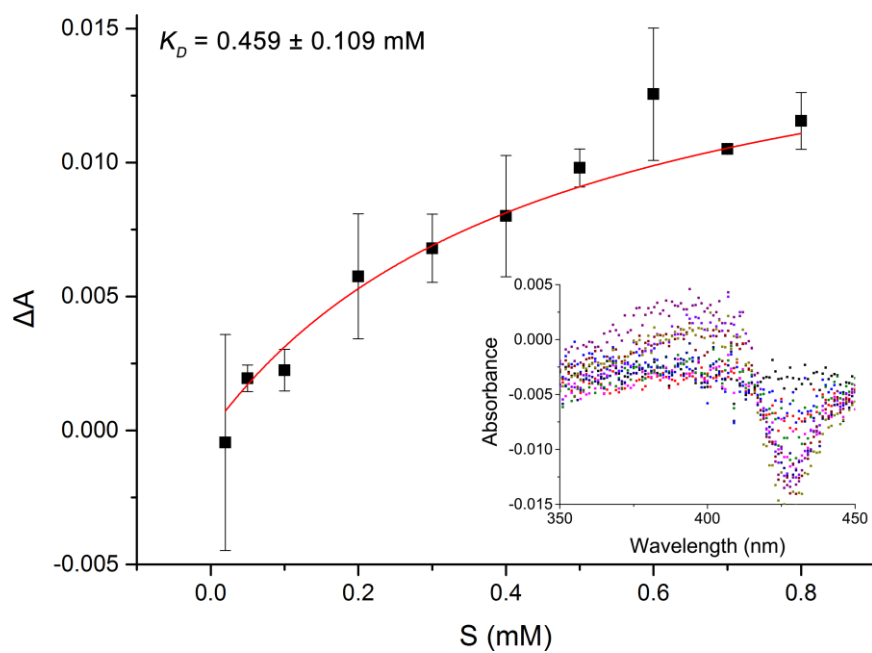

**Fig. S9. The binding curve of 4-cresol to the S261A mutant.**

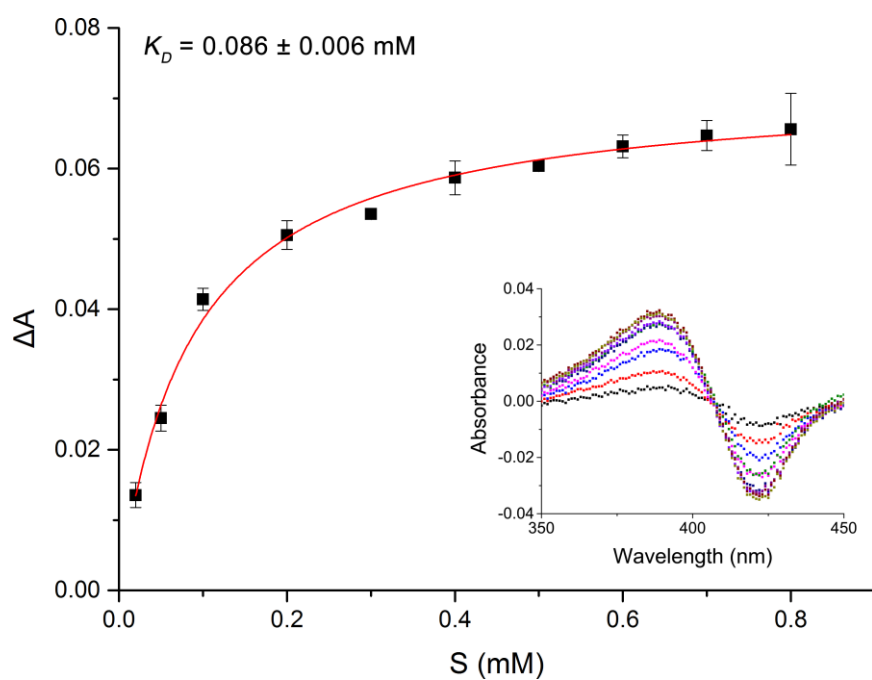

**Fig. S10. The binding curve of 4-cresol to the Q83A mutant.**

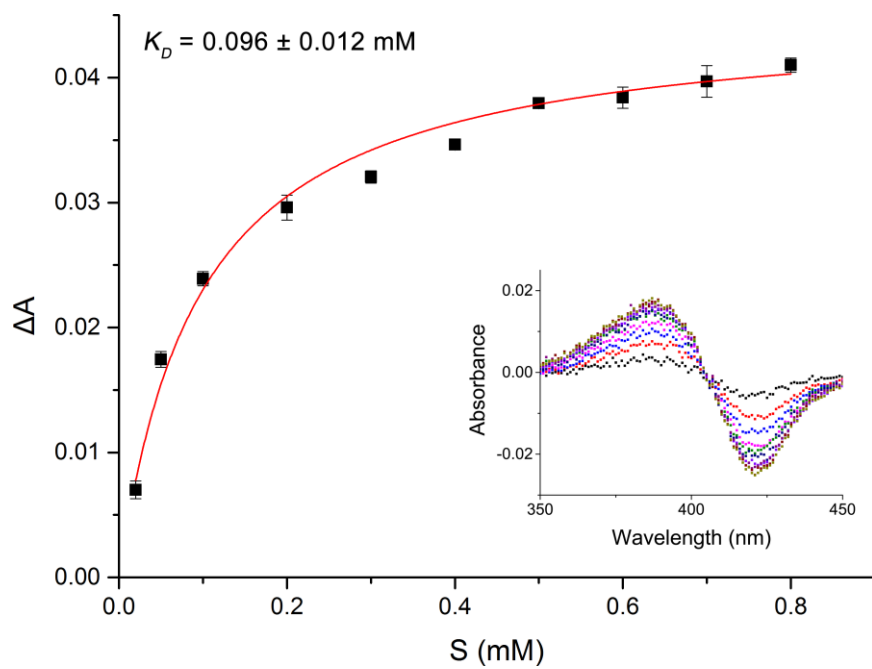

**Fig. S11. The binding curve of 4-cresol to the S109A mutant.**

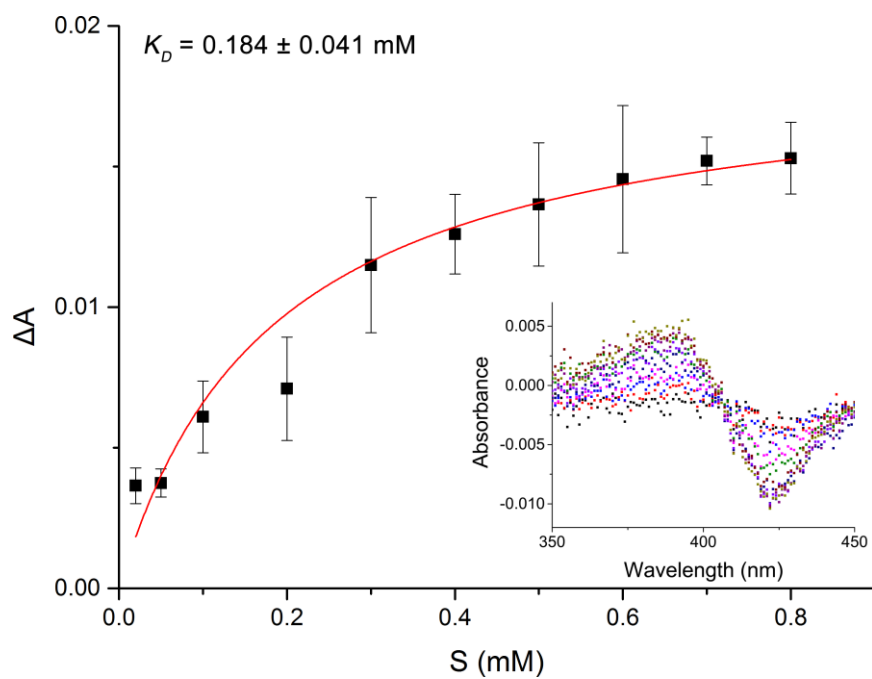

**Fig. S12. The binding curve of 4-cresol to the W199A mutant.**

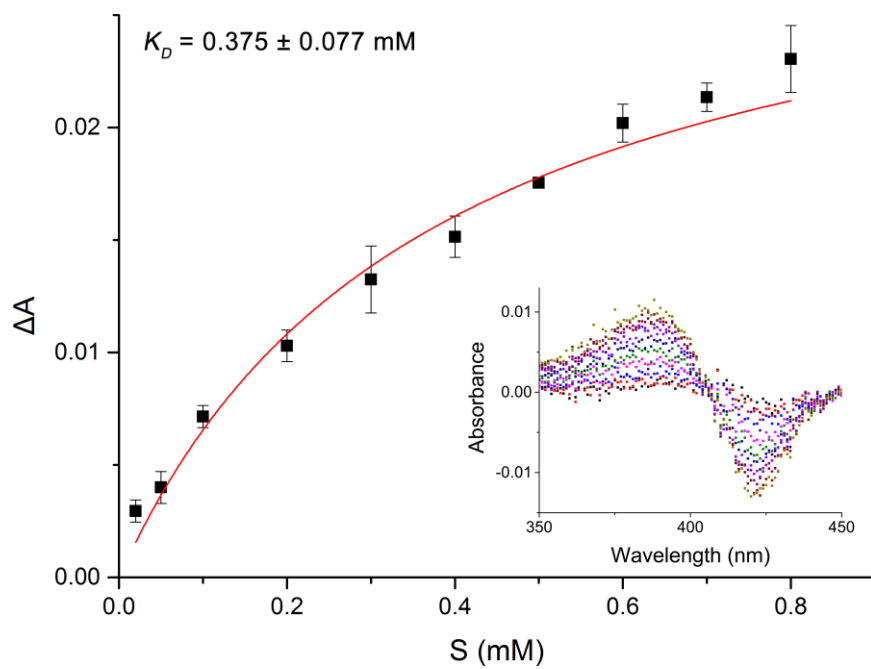

**Fig. S13.** The binding curve of 4-cresol to the I312A mutant.

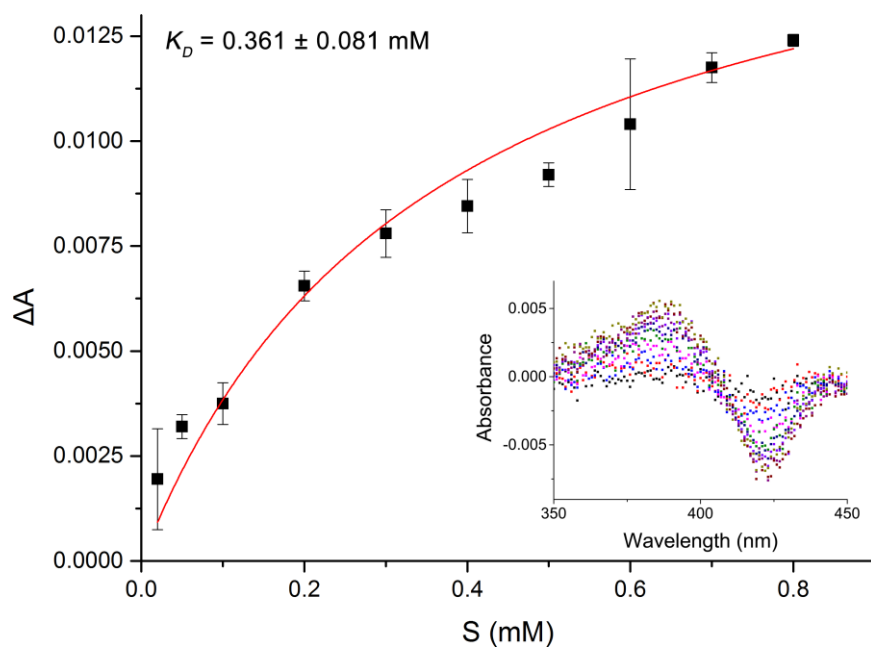

**Fig. S14.** The binding curve of 4-cresol to the F416A mutant.

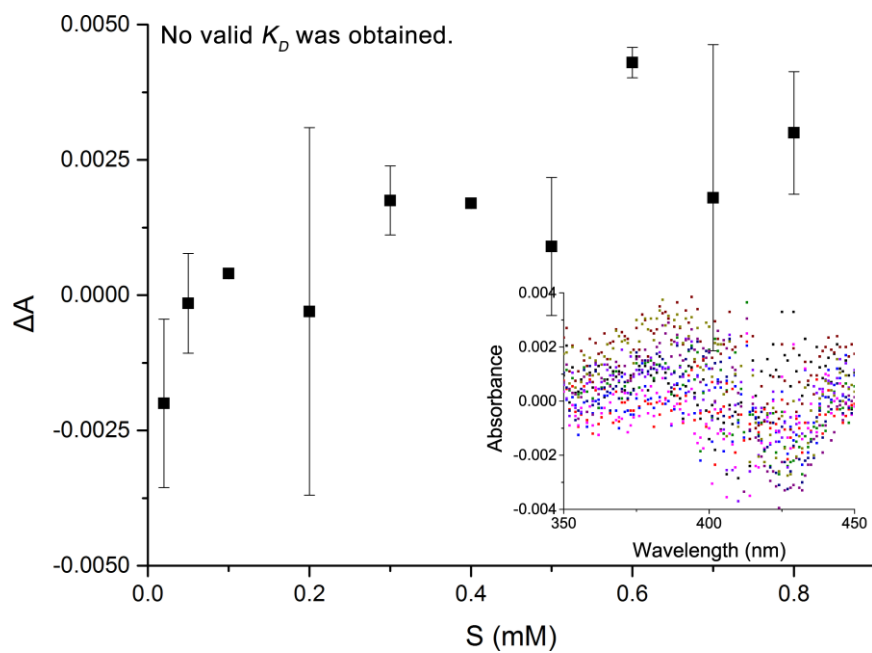

**Fig. S15. The binding curve of 4-cresol to the F264A mutant.**

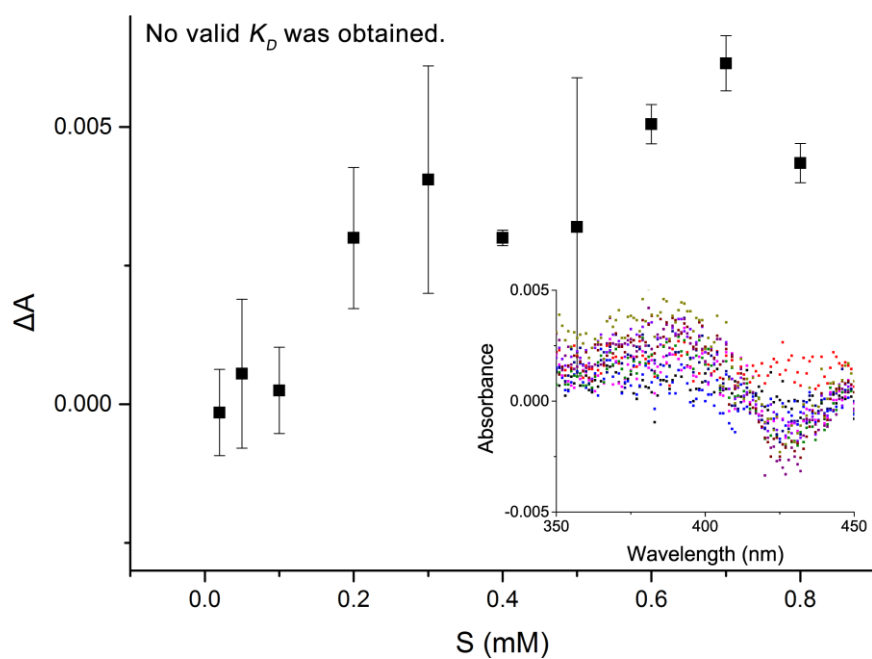

**Fig. S16. The binding curve of 4-cresol to the W315A mutant.**

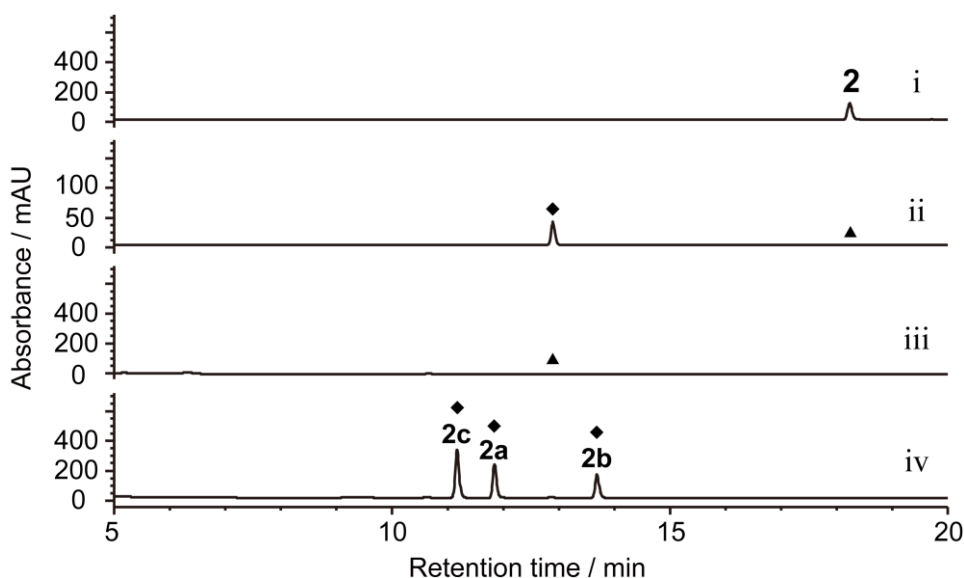

**Fig. S17. Preliminary reactivity determination of CreHI, CreJEF and CreD towards 2 and its derivatives.** Trace i, Negative control; trace ii, 2 + CreHI; trace iii, the post-CreHI reaction mixture + CreJEF; trace iv, the post-CreHI/CreJEF reaction mixture + CreD. ◆ indicates product generation compared to the upper trace. ▲ indicates significant substrate consumption compared to the upper trace.

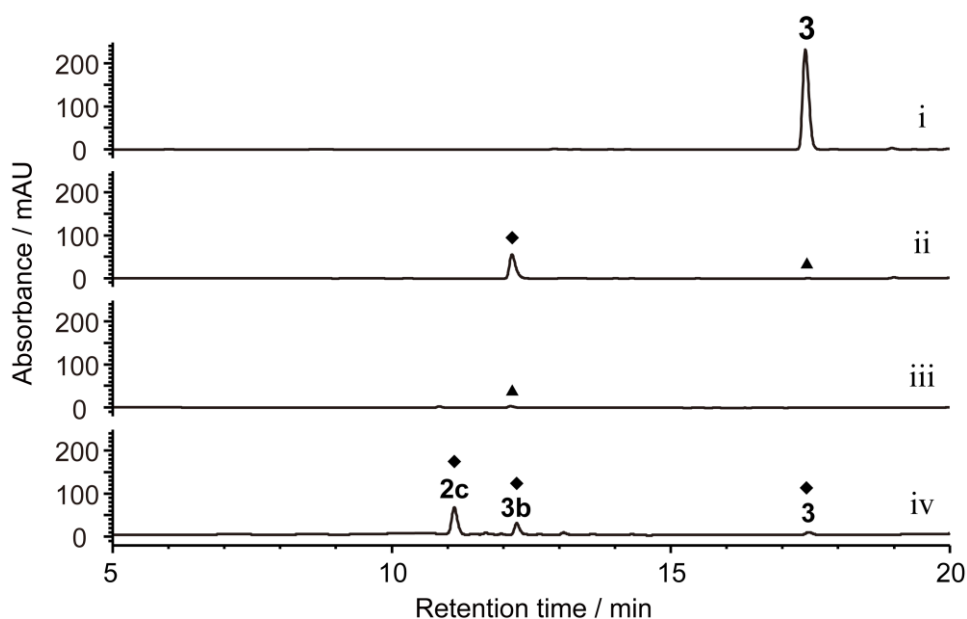

**Fig. S18. Preliminary reactivity determination of CreHI, CreJEF and CreD towards 3 and its derivatives.** Trace i, Negative control; trace ii, 3 + CreHI; trace iii, the post-CreHI reaction mixture + CreJEF; trace iv, the post-CreHI/CreJEF reaction mixture + CreD. ◆ indicates product generation compared to the upper trace. ▲ indicates significant substrate consumption compared to the upper trace.

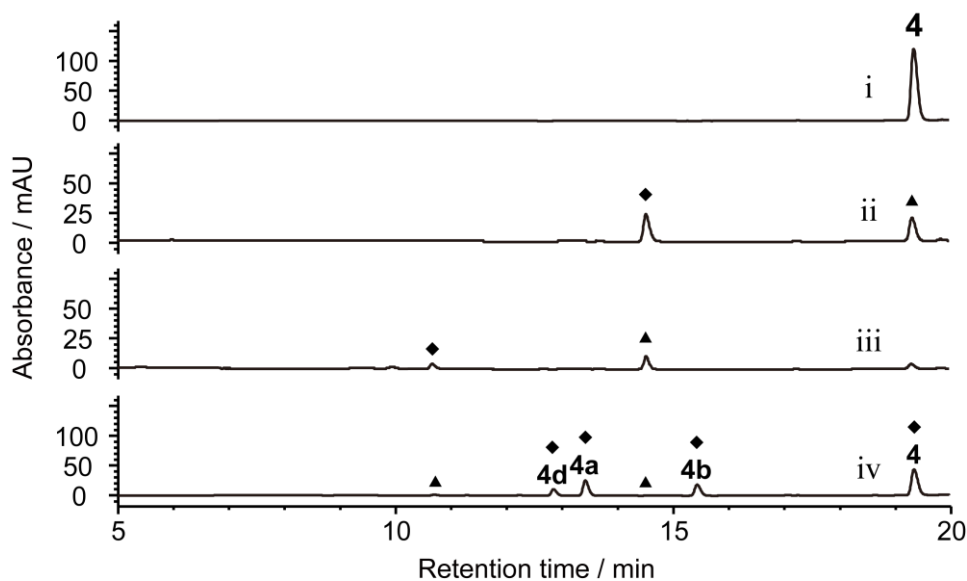

**Fig. S19. Preliminary reactivity determination of CreHI, CreJEF and CreD towards 4 and its derivatives.** Trace i, Negative control; trace ii, 4 + CreHI; trace iii, the post-CreHI reaction mixture + CreJEF; trace iv, the post-CreHI/CreJEF reaction mixture + CreD. ◆ indicates product generation compared to the upper trace. ▲ indicates significant substrate consumption compared to the upper trace.

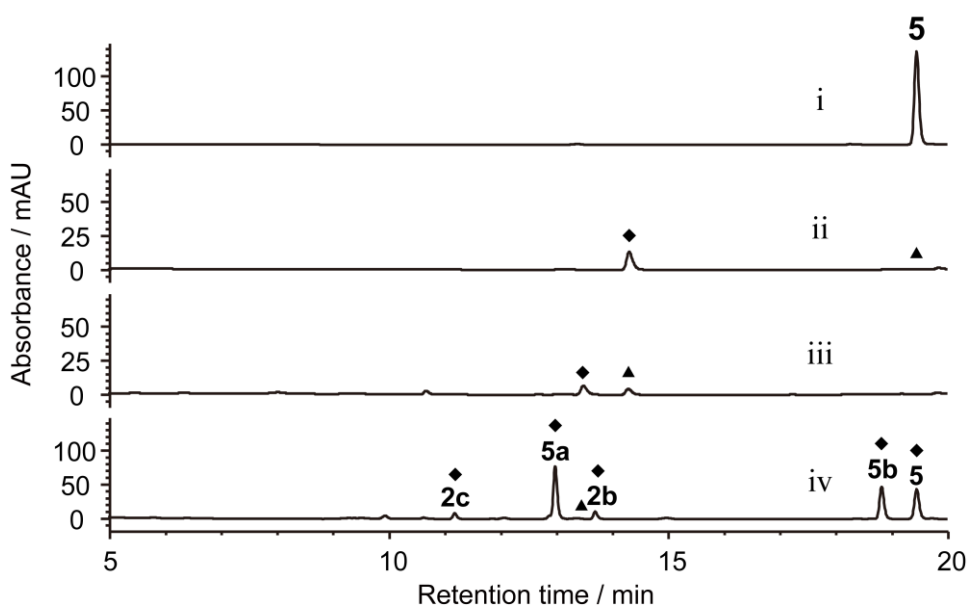

**Fig. S20. Preliminary reactivity determination of CreHI, CreJEF and CreD towards 5 and its derivatives.** Trace i, Negative control; trace ii, 5 + CreHI; trace iii, the post-CreHI reaction mixture + CreJEF; trace iv, the post-CreHI/CreJEF reaction mixture + CreD. ◆ indicates product generation compared to the upper trace. ▲ indicates significant substrate consumption compared to the upper trace.

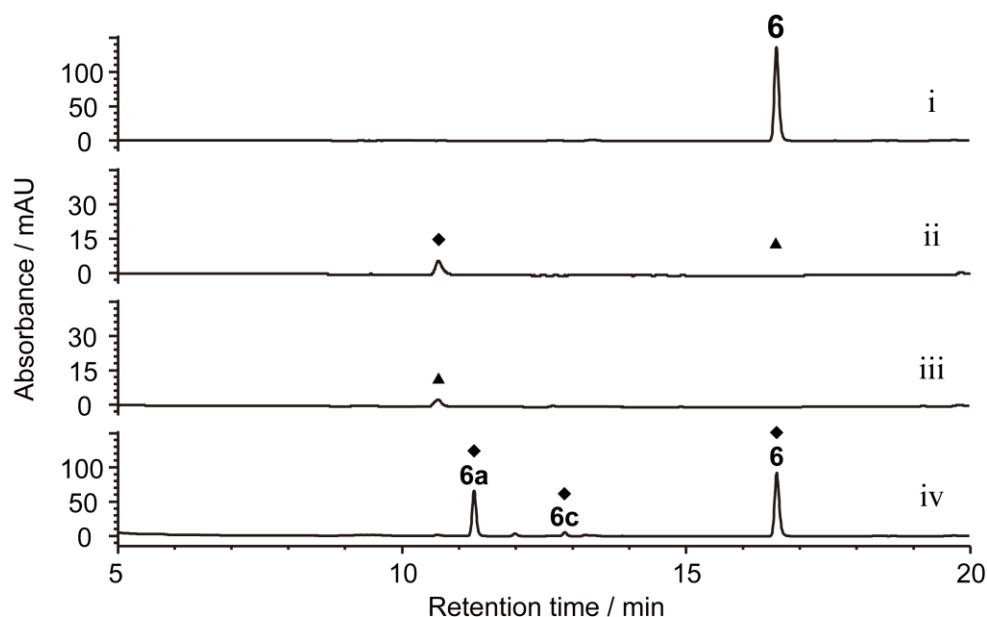

**Fig. S21. Preliminary reactivity determination of CreHI, CreJEF and CreD towards 6 and its derivatives.** Trace i, Negative control; trace ii, 6 + CreHI; trace iii, the post-CreHI reaction mixture + CreJEF; trace iv, the post-CreHI/CreJEF reaction mixture + CreD. ◆ indicates product generation compared to the upper trace. ▲ indicates significant substrate consumption compared to the upper trace.

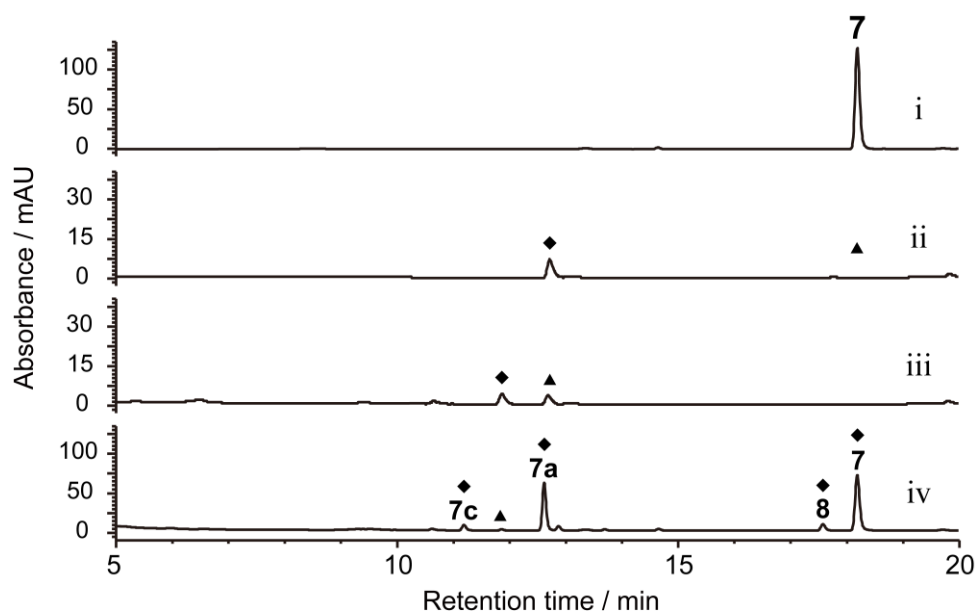

**Fig. S22. Preliminary reactivity determination of CreHI, CreJEF and CreD towards 7 and its derivatives.** Trace i, Negative control; trace ii, 7 + CreHI; trace iii, the post-CreHI reaction mixture + CreJEF; trace iv, the post-CreHI/CreJEF reaction mixture + CreD. ◆ indicates product generation compared to the upper trace. ▲ indicates significant substrate consumption compared to the upper trace.

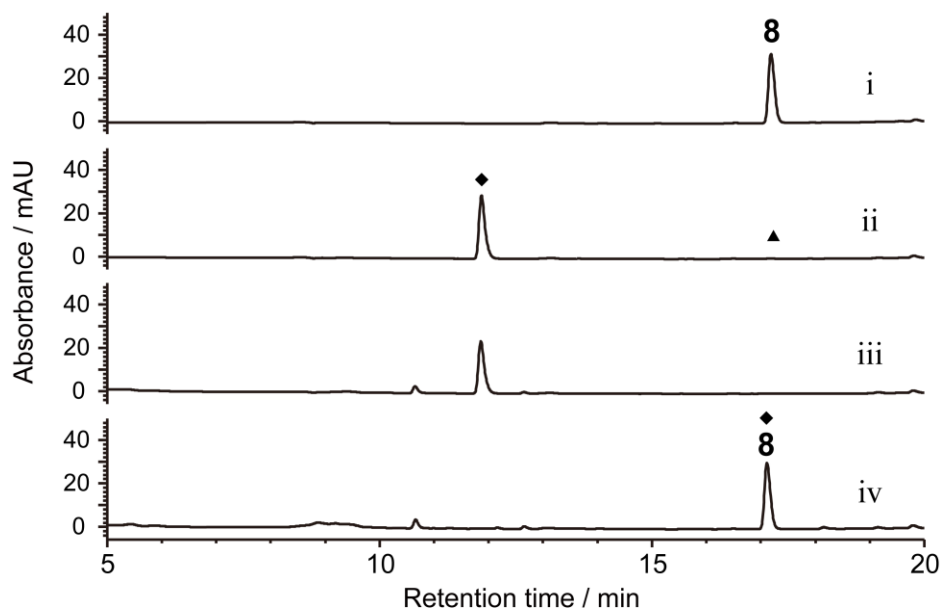

**Fig. S23. Preliminary reactivity determination of CreHI, CreJEF and CreD towards **8** and its derivatives.** Trace i, Negative control; trace ii, **8** + CreHI; trace iii, the post-CreHI reaction mixture + CreJEF; trace iv, the post-CreHI/CreJEF reaction mixture + CreD. ◆ indicates product generation compared to the upper trace. ▲ indicates significant substrate consumption compared to the upper trace.

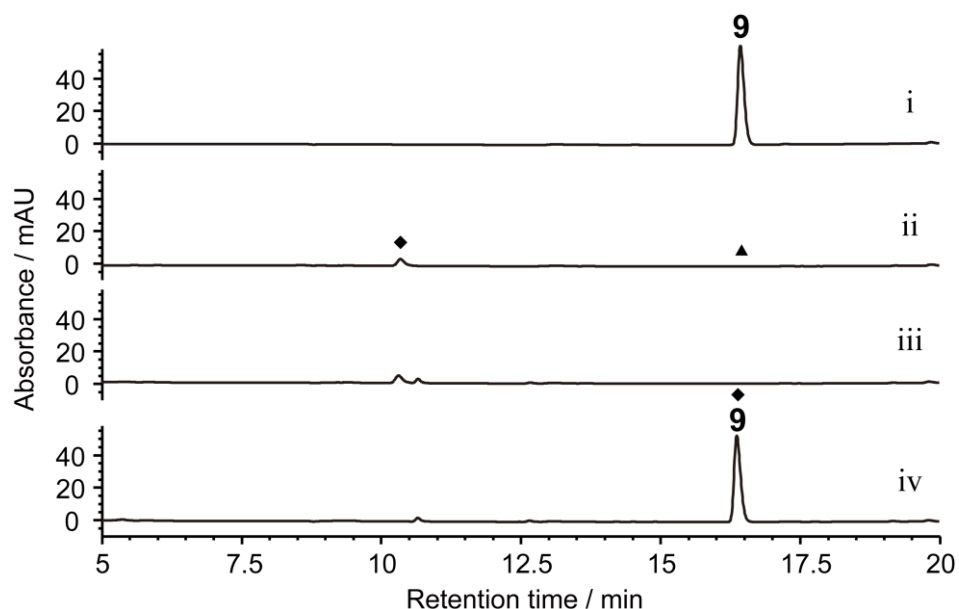

**Fig. S24. Preliminary reactivity determination of CreHI, CreJEF and CreD towards **9** and its derivatives.** Trace i, Negative control; trace ii, **9** + CreHI; trace iii, the post-CreHI reaction mixture + CreJEF; trace iv, the post-CreHI/CreJEF reaction mixture + CreD. ◆ indicates product generation compared to the upper trace. ▲ indicates significant substrate consumption compared to the upper trace.



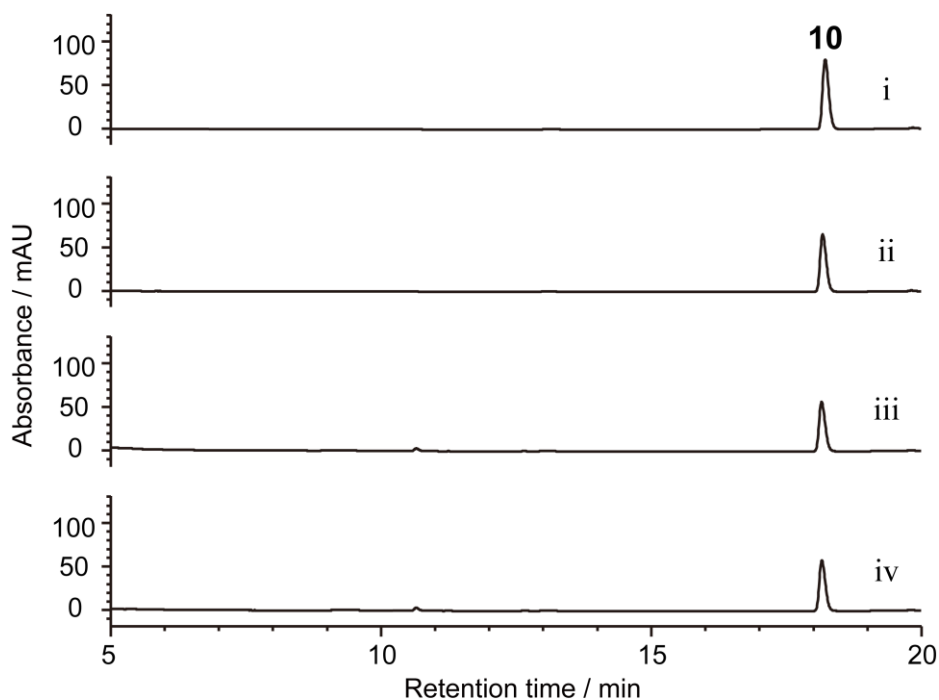

**Fig. S25. Preliminary reactivity determination of CreHI, CreJEF and CreD towards 10 and its derivatives.** Trace i, Negative control; trace ii, **10** + CreHI; trace iii, the post-CreHI reaction mixture + CreJEF; trace iv, the post-CreHI/CreJEF reaction mixture + CreD.

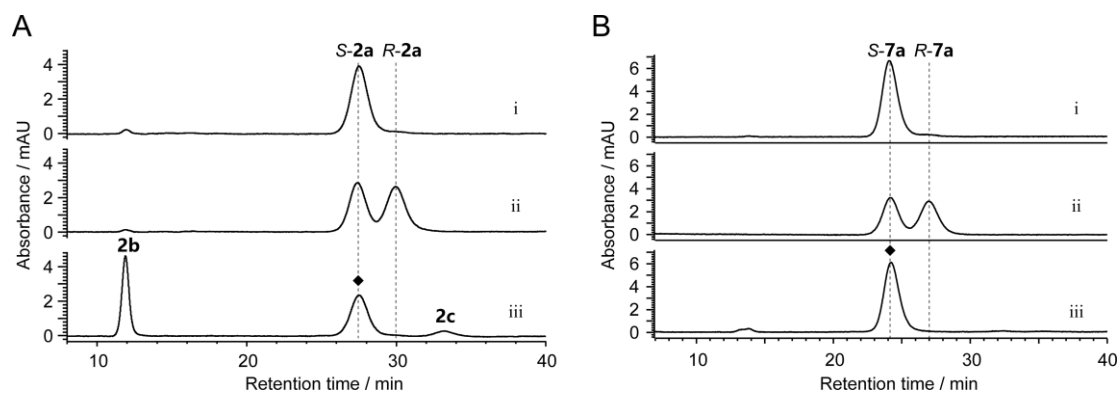

**Fig. S26. Determination of the absolute configuration of 2a (A) and 7a (B) by chiral HPLC analysis.** (A) Trace i, *S*-**2a** authentic standard; trace ii, racemic **2a** standard; trace iii, the reaction mixture of **2** sequentially reacted with CreHI/CreJEF and CreD. ◆ indicates only *S*-**2a** was produced. (B) Trace i, *S*-**7a** authentic standard; trace ii, racemic **7a** standard; trace iii, the reaction mixture of **7** sequentially reacted with CreHI/CreJEF and CreD. ◆ indicates only *S*-**7a** was produced.

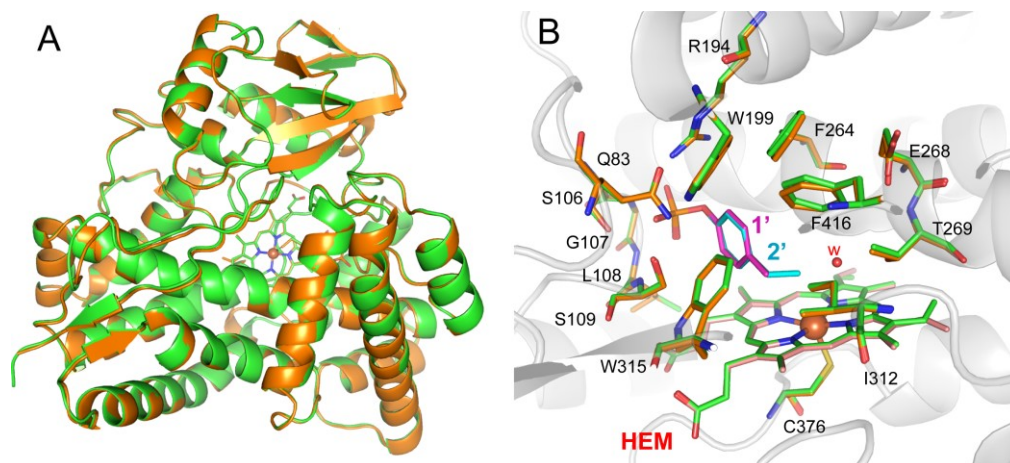

**Fig. S27. Structural comparison of CreJ-1' (green, 5GWE) and CreJ-2' (orange, 5XJN).** (A) Superimposition of CreJ-1' and CreJ-2'. (B) Conformational alignment of the active site residues. Substrate 1' and 2' are shown in purple and cyan, respectively. “w” represents the water molecule observed only in the CreJ-1' structure.

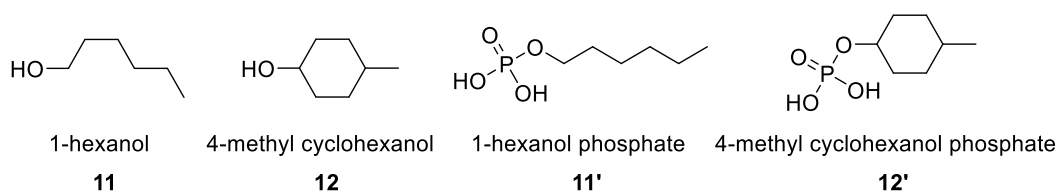

**Fig. S28. Structures of non-aromatic 11, 12, 11' and 12'.**

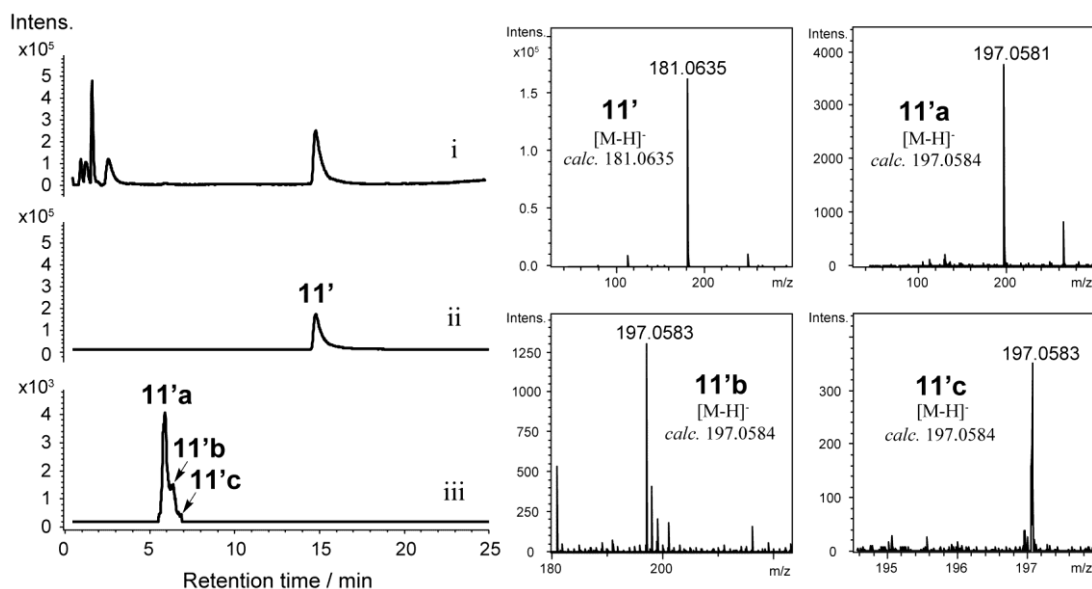

**Fig. S29. LC-HRMS analysis of the CreJ reactivity towards 11'.** Trace i, the total ion chromatography (TIC) of the CreJEF catalyzed reaction with 11' as substrate; trace ii, the extract ion chromatography at m/z 181; trace iii, the extract ion chromatography at m/z 197. The right panel shows the high resolution mass spectra of 11' and 11'a-c.

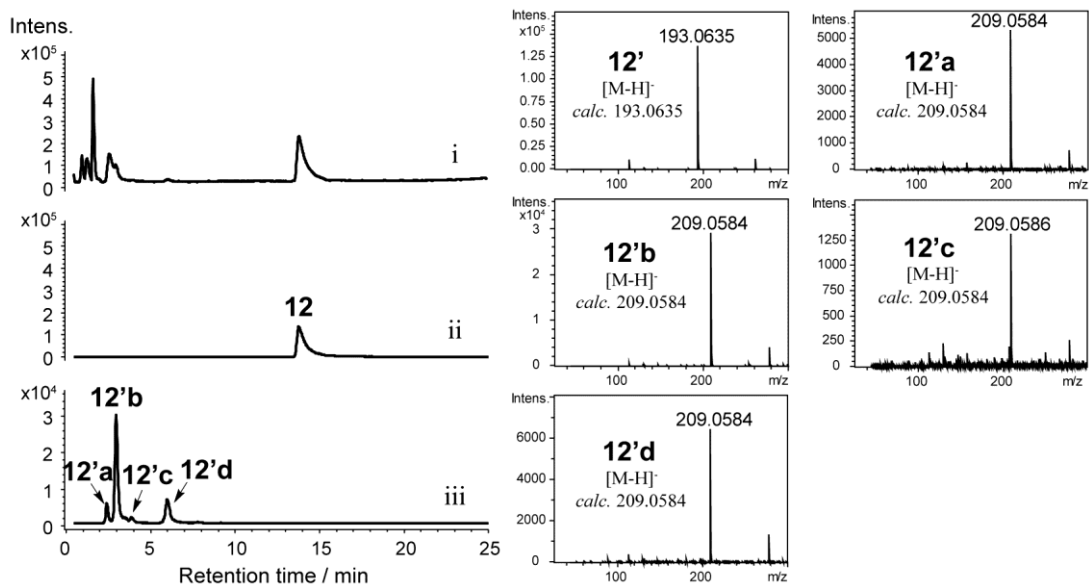

**Fig. S30. LC-HRMS analysis of the CreJ reactivity towards 12'.** Trace i, the total ion chromatography (TIC) of the CreJEF catalyzed reaction with **12'** as substrate; trace ii, the extract ion chromatography at m/z 193; trace iii, the extract ion chromatography at m/z 209. The right panel shows the high resolution mass spectra of **12'** and **12'a-d**.





$\alpha 6$   $\beta 4$   $\pi 1$   $\alpha 7$   $\eta 1$   $\alpha 8$   
 CYP288A2 0000000000000000 TT 00000 000000000 00 0000000000000000 000000  
 140 150 160 170 180 190 200 210

CYP288A2 D I R A M V I D R V E K M L A N D Q . . . H V G D M V S D L A Y D F E T I T I L T L I G A D I S . . M V D T Y K R W S D S R A A M T W G D L S D E E Q I F P H A H  
 W P \_ 0 1 1 0 1 3 7 2 6 . 1 D I R A M V I D R V E K M L A N D Q . . . H V G D M V S D L A Y D F E T I T I L T L I G A D I S . . M V D T Y K R W S D S R A A M T W G D L S D E E Q I F P H A H  
 W P \_ 0 6 0 5 6 4 0 7 5 . 1 D I R A M V I D R V E K M L A N D Q . . . H V G D M V S D L A Y D F E T I T I L T L I G A D I S . . M V D T Y K R W S D S R A A M T W G D L S D E E Q I F P H A H  
 W P \_ 0 6 5 3 6 6 6 5 2 . 1 D I R A M V I D R V E K M L A N D Q . . . H V G D M V S D L A Y D F E T I T I L T L I G A D I S . . M V D T Y K R W S D S R A A M T W G D L S D E E Q I F P H A H  
 W P \_ 0 0 3 8 6 0 6 1 5 . 1 D I R A M V I D R V E K M L A N D Q . . . H V G D M V S D L A Y D F E T I T I L T L I G A D I S . . M V D T Y K R W S D S R A A M T W G D L S D E E Q I F P H A H  
 W P \_ 0 6 3 9 6 7 3 2 1 . 1 D I R A M V I D R V E K M L A N D Q . . . H V G D M V S D L A Y D F E T I T I L T L I G A D I S . . M V D T Y K R W S D S R A A M T W G D L S D E E Q I F P H A H  
 W P \_ 0 3 8 5 8 2 7 7 9 . 1 D I R A M V I D R V E K M L A N D Q . . . H V G D M V S D L A Y D F E T I T I L T L I G A D I S . . M V D T Y K R W S D S R A A M T W G D L S D E E Q I F P H A H  
 W P \_ 0 0 6 2 8 7 2 4 5 . 1 D I R A M V I D R V E K M L A N D Q . . . H V G D M V S D L A Y D F E T I T I L T L I G A D I S . . M V D T Y K R W S D S R A A M T W G D L S D E E Q I F P H A H  
 W P \_ 0 4 4 0 2 6 9 2 4 . 1 D I R A M V I D R V E K M L A N D Q . . . H V G D M V S D L A Y D F E T I T I L T L I G A D I S . . M V D T Y K R W S D S R A A M T W G D L S D E E Q I F P H A H  
 W P \_ 0 4 0 9 6 6 9 9 8 . 1 D I R A M V I D R V E K M L A N D Q . . . H V G D M V S D L A Y D F E T I T I L T L I G A D I S . . M V D T Y K R W S D S R A A M T W G D L S D E E Q I F P H A H  
 B A F 5 3 6 3 7 . 1 D I R A M V I D R V E K M L A N D Q . . . H V G D M V S D L A Y D F E T I T I L T L I G A D I S . . M V D T Y K R W S D S R A A M T W G D L S D E E Q I F P H A H  
 W P \_ 0 0 3 8 5 4 3 9 9 . 1 D I R A M V I D R V E K M L A N D Q . . . H V G D M V S D L A Y D F E T I T I L T L I G A D I S . . M V D T Y K R W S D S R A A M T W G D L S D E E Q I F P H A H  
 B A U 9 4 9 5 4 . 1 D I R A M V V D R V E K M L A H Q D . . . P V G D M V S D L A Y D F E T I T I L T L I G A D I S . . M V D T Y K R W S D S R A A M T W G D L S D E E Q I F P H A H  
 W P \_ 0 6 6 5 6 4 5 6 2 . 1 D I R A M V I D R V E K M L Q S Q D . . . C T G D M F T D L A Y D F E T I T I L T L I G A D I S . . M V D T Y K R W S D S R A A M T W G D L S D E E Q I F P H A H  
 W P \_ 0 3 5 1 0 9 7 6 0 . 1 D I R A N V V A R L E T M L K Q G . . . A P A D I V P A L A Y D F E T I T I L T L I G A D V S . . M V D T Y K R W S D S R A A M T W G D L S D E E Q I F P H A H  
 E E W 5 0 1 7 7 . 1 D I R A N V V A R L E T M L K Q G . . . A P A D I V P A L A Y D F E T I T I L T L I G A D V S . . M V D T Y K R W S D S R A A M T W G D L S D E E Q I F P H A H  
 B A C 1 7 3 7 2 . 1 D I R A N V V A R L E T M L K Q G . . . A P A D I V P A L A Y D F E T I T I L T L I G A D V S . . M V D T Y K R W S D S R A A M T W G D L S D E E Q I F P H A H  
 W P \_ 0 1 5 3 9 9 9 6 6 . 1 D I R A N V A S R L E A M L A R E D . . . R A G E M V K D L A Y D F E T I T I L T L I G A D T S . . Q V D T Y K R W S D S R A A M T W G D L S D E E Q I F P H A H  
 W P \_ 0 1 0 1 4 4 9 4 8 . 1 D I R A N V V S R L E A V A L A R Q D . . . R T G E M V Q D L A Y E F E T I T I L T L I G A D V S . . K I D T Y K R W S D S R A A M T W G D L T D E E Q V P H A H  
 W P \_ 0 2 6 1 9 6 1 5 5 . 1 D I R Q G V Q Q R L E A M L A R D S . . . K E G E M V Q D L A Y D F E T I T I L T L I G A D T S . . K I D T Y K R W S D S R A A M T W G D L S D E E Q I F P H A H  
 W P \_ 0 6 2 8 6 1 3 7 1 . 1 E I R E N V V S R I E K M L E R P D . . . K D G E I I R D L A Y D F E T I T I L T L I G A D I S . . K V D T Y K R W S D S R A A M T W G D L S D E E Q I F P H A H  
 W P \_ 0 3 9 2 0 7 2 3 5 . 1 E I R E N V V S R I E K M L E R P D . . . K D G E I I R D L A Y D F E T I T I L T L I G A D I S . . K V D T Y K R W S D S R A A M T W G D L S D E E Q I F P H A H  
 W P \_ 0 6 2 2 4 1 6 4 1 . 1 E I R D N V V S R I E T M L A R P D . . . K D G E I I R D L A Y D F E T I T I L T L I G A D I D . . K V D T Y K R W S D S R A A M T W G D L S D E E Q I F P H A H  
 W P \_ 0 1 1 6 9 1 8 4 1 . 1 F I R Q N V I E L I E K M L A R P E . . . H R G D M V K D L A Y D F E T I T I L T L I G A D V S . . Q V D T F K R W S D S R A A M T W G D L S D E E Q I F P H A H  
 W P \_ 0 2 4 3 6 7 9 6 1 . 1 F I R Q N V V E L L E K M L A R P E . . . H R G D M V K D L A Y D F E T I T I L T L I G A D V S . . Q V D T F K R W S D S R A A M T W G D L S D E E Q I F P H A H  
 W P \_ 0 0 5 2 7 3 4 0 9 . 1 F I R Q N V V Q L E R M L A N P E . . . R R G D I F R D L A Y D F E T I T I L T L I G A D V E . . Q V D F K R W S D S R A A M T W G D L S D E E Q I F P H A H  
 W P \_ 0 4 3 4 8 1 2 4 7 . 1 F I R Q N V V E L L E K M L A R P E . . . H R G D M V K D L A Y D F E T I T I L T L I G A D V S . . Q V D T F K R W S D S R A A M T W G D L S D E E Q I F P H A H  
 W P \_ 0 5 5 8 0 6 6 7 5 . 1 F I R Q N V V E L L E K M L A R P E . . . H R G D M V K D L A Y D F E T I T I L T L I G A D V S . . Q V D T F K R W S D S R A A M T W G D L S D E E Q I F P H A H  
 W P \_ 0 6 2 2 8 9 5 8 1 . 1 D I R A N V V E R L E S M L G R P E . . . R T G D M V A D L A Y D F E T I T I L T L I G A D T A . . E I D K Y K R W S D S R A A M T W G L N D E E Q I F P H A H  
 W P \_ 0 2 8 2 6 9 4 0 2 . 1 F I R Q N V V E L L E R M L A R P E . . . R R G D M V K D L A Y D F E T I T I L T L I G A D V S . . Q V D T F K R W S D S R A A M T W G D L S D E E Q I F P H A H  
 W P \_ 0 2 8 2 7 6 6 4 0 . 1 F I R Q N V V G L L E K M L A R P E . . . S R G D M V K D L A Y D F E T I T I L T L I G A D V A . . Q V D T F K R W S D S R A A M T W G D L T D D E Q I F P H A H  
 W P \_ 0 2 6 5 3 9 5 6 9 . 1 F I R Q N V V E L L E K M L A R P E . . . H R G D M V K D L A Y D F E T I T I L T L I G A D V S . . Q V D T F K R W S D S R A A M T W G D L S D E E Q I F P H A H  
 W P \_ 0 1 8 7 7 5 0 0 7 . 1 F I R Q N V V E L L E K M L A R P E . . . H R G D M V K D L A Y D F E T I T I L T L I G A D V S . . Q V D T F K R W S D S R A A M T W G D L S D E E Q I F P H A H  
 W P \_ 0 1 3 6 0 0 8 4 3 . 1 F I R Q N V V A L I E K M L A R P E . . . R R G D L V K D L A Y D F E T I T I L T L I G A D V S . . Q V D F K R W S D S R A A M T W G D L S D E E Q I F P H A H  
 W P \_ 0 2 8 2 6 5 7 1 7 . 1 F I R Q N V V E L L E T M L A R P E . . . H R G D M V K D L A Y D F E T I T I L T L I G A D V S . . Q V D T F K R W S D S R A A M T W G D L S D E E Q I F P H A H  
 W P \_ 0 6 8 7 3 4 2 8 3 . 1 S I R A N V I D S I Q A M L A R E S . . . G T G D I V K D L A Y A F E T I T I L T L I G A D T A . . Q V D T Y K R W S D S R A A M T W G D L S D E E Q I F P H A H  
 W P \_ 0 6 9 9 5 0 2 1 3 . 1 F I R Q N V V G L L E K M L A R P D . . . R H G D L V K D L A Y D F E T I T I L T L I G A D V S . . Q V D T F K R W S D S R A A M T W G D L S D E E Q I F P H A H  
 W P \_ 0 0 7 2 6 9 7 2 1 . 1 S I R A N V V T S I E A M L A R E S . . . A E G D I V K D L A Y A F E T I T I L T L I G A D V T . . Q V D T Y K R W S D S R A A M T W G D L S D E E Q I F P H A H  
 A I S 6 7 7 8 6 . 2 S I R A N V V T S I E A M L A R E S . . . A E G D I V K D L A Y A F E T I T I L T L I G A D V T . . Q V D T Y K R W S D S R A A M T W G D L S D E E Q I F P H A H  
 W P \_ 0 6 6 1 4 3 3 2 8 . 1 M I R E N V S A I E Q M L A R S D . . . G H A E I V A D L A Y S F E T I T I V T L I G A D I S . . K V D T Y K R W S D S R A A M T W G D L S D E E Q I F P H A H  
 W P \_ 0 3 8 9 9 2 9 2 6 . 1 M I R E N V S A I E Q M L A R G D . . . G H A E I V A D L A Y S F E T I T I V T L I G A D I S . . K V D T Y K R W S D S R A A M T W G D L S D E E Q I F P H A H  
 W P \_ 0 4 7 1 2 0 3 2 6 . 1 M I R Q N V K D S I S A M L A N G . . . N H S D I V A D L A Y A F E T I T I L T L I G E D V G . . M V D T Y K R W S D S R A A M T W G D L S D E E Q I F P H A H  
 W P \_ 0 5 3 7 9 9 0 0 0 . 1 M I R Q N V K D S I S A M T T K G T . . . S H A D I V A E L A Y S F E T I T I L T L I G E D V T . . M V D T Y K R W S D S R A A M T W G D L S D E E Q I F P H A H  
 W P \_ 0 4 0 7 9 5 1 8 0 . 1 Q I R A N V R L L E T M L A R P E . . . R R G D L V R D L A Y D F E T I T I L T L I G A D V N . . Q I D T F K R W S D S R A A M T W G D L S D E E Q I F P H A H  
 W P \_ 0 6 4 0 8 0 1 1 2 . 1 S I R A Q V V N L L E N M L E R P G . . . H E G D I V A D L A Y D F E T I T I L T L I G A D T S . . Q V P F K R W S D S R A A M T W G D L S D E E Q I F P H A H  
 W P \_ 0 4 5 1 9 1 4 4 0 . 1 T I R A N V V A A Q V E A F L A R P E . . . R R A D L V R D L A Y T V F T I L T L I G A D V S . . Q V D T Y K R W S D S R A A M T W G D L S D E E Q V P H A H  
 W P \_ 0 6 6 5 0 1 3 0 1 . 1 F I R Q N V A D R L D A M I A R G Q D T A A H H G E I V K D L A Y E V P T I T I L T L I G E D L A . . K L D D Y K R W S D S R A A M T W G D L S D E E Q I F P H A H  
 W P \_ 0 5 2 0 2 4 0 0 2 . 1 S I R A Q V V N L L E N L L E R P G . . . H E G D I V A D L A Y D F E T I T I L T L I G A D T S . . Q V P F K R W S D S R A A M T W G D L S D E E Q I F P H A H  
 W P \_ 0 2 6 4 5 3 0 5 0 . 1 A I R A N V V D Q L E Q L L S K D S . . . R T G D L V R D L A Y D F E T I T I L T L I G A D T S . . Q V D T Y K R W S D S R A A M T W G D L S D E E Q I F P H A H  
 W P \_ 0 6 7 1 3 7 0 5 2 . 1 S I R Q H V T I L L E R M L A R P E . . . A T G D F V R D L A Y D F E T I T I L T L I G A D T G . . Q V D T F K R W S D S R A A M T W G D L S D E E Q I F P H A H  
 E L B 9 0 0 5 3 . 1 S I R A Q V V N L L E N L L E R P G . . . H E G D I V A D L A Y D F E T I T I L T L I G A D T S . . Q V P F K R W S D S R A A M T W G D L S D E E Q I F P H A H  
 W P \_ 0 2 9 3 3 9 8 1 9 . 1 A I R D H V R E V E A M L Q R P D . . . R T G D L V A D L A Y D F E T I T I L T L I G A D T S . . Q V N T Y K R W S D S R A A M T W G D L S D E E Q I F P H A H  
 W P \_ 0 5 5 5 9 7 5 3 0 . 1 D I R A N V V R L L E T M L A R P E . . . R R G D L V R D L A Y D F E T I T I L T L I G A D V S . . Q I D T F K R W S D S R A A M T W G D L S D E E Q V P H A H  
 W P \_ 0 6 6 9 4 1 5 3 7 . 1 S I R Q H V T I L L E R M L A R P E . . . A A G D F V R D L A Y D F E T I T I L T L I G A D T G . . K V D T F K R W S D S R A A M T W G D L S D E E Q I F P H A H  
 W P \_ 0 4 0 1 6 8 0 2 8 . 1 T I R E N T R A A L A A M L A N P E . . . R T G D F L A E T A Y D F E T I T I L T L I G V D P A . . M V P T Y K R W S D S R A A M T W G D L D E E Q V P H A H  
 W P \_ 0 3 3 2 9 3 9 7 9 . 1 E I R A N V V R L L E T M L A R P E . . . H Y G D L V R D L A Y D F E T I T I L T L I G A D I G . . Q V G T F K R W S D S R A A M T W G D L S D E E Q I F P H A H  
 W P \_ 0 6 1 2 5 2 8 3 7 . 1 S I R Q H V T I L L E R M L A R F K . . . A T G D F V R D L A Y D F E T I T I L T L I G A D T G . . K V D T F K R W S D S R A A M T W G D L S D E E Q V P H A H  
 W P \_ 0 0 6 3 3 5 1 3 9 . 1 A I R A N V V A Q L E A M L A R D T . . . K T G D L L R D L A Y D F E T I T I L T L I G A D V T . . Q V D T Y K R W S D S R A A M T W G L S D E E Q V P H A H  
 W P \_ 0 2 0 3 8 9 6 2 5 . 1 A I R A N V V A Q L E G L L A N P G . . . R R G D L V K D L A Y Q V E T I T I L T L I G A D T S . . Q V D T Y K R W S D S R A A M T W G D L S D E E Q I F P H A H  
 W P \_ 0 5 3 4 4 7 2 8 2 . 1 E I R E N V R L L D M L A R P E . . . A K G D I V R D L A R D V E T I T I L T L I G E D V D . . Q V D F K R W S D S R A A M T W G D L S D E E Q I F P H A H  
 W P \_ 0 2 4 3 6 8 4 8 1 . 1 F I R Q N V H I L V T M L A R P E . . . R R G D I V R D L A Y D F E T I T I L T L I G E D V A . . M I P S Y K R W S D S R A A M T W G L S D E E Q I F P H A H  
 W P \_ 0 2 2 8 7 0 1 6 6 . 1 M I R D N V K A S I Q M L A K P T . . . P H A D I V S V A Y S F E T I T I L T L I G E S T P E T I D Q Y K R W S D S R A A M T W G L S D E E Q I F P H A H  
 O D T 1 1 9 7 0 . 1 T I R E N T R T A L Q R M L E S P D . . . R G G D V H D L A F D F E T I T I L T L I G V D P A . . M V P T Y K R W S D S R A A M T W G D L S D E E Q V P H A H  
 W P \_ 0 4 3 0 5 5 8 0 3 . 1 M I R D N V R T A S I E R M L A K P T . . . P H A D I I A D V A Y S F E T I T I L T L I G E D T P E T V D Q Y K R W S D S R A A M T W S L S D E E Q I F P H A H  
 W P \_ 0 5 6 7 2 8 8 2 8 . 1 A I R E N T R T A L R A M L E S P D . . . R T G D F L M D V A Y E F E T I T I L T L I G V D P A . . M V P T Y K R W S D S R A A M T W G D L S D E E Q I F P H A H  
 B A U 9 9 4 9 8 . 1 A I R E N V D I M I D K M L A A G E . . . P G D I I S D I A N D F E T I T I L T L I G V P I S . . R I P E I K W S G S R A L M T W A E L T D E E Q I F P H A H  
 W P \_ 0 3 5 8 7 7 8 7 8 . 1 T I R E N T A R L L Q Q M L A H P D . . . A R G D F I T D V A Y D F E T I T I L G L L G V G P E . . M V P T Y K R W S D S R A A M T W G L S D E E Q I F P H A H  
 S B T 3 8 7 4 3 . 1 Q I R A N V V R L L K R M L L R A E . . . R T G D L V S D L A I D V E T I T I L T L I G A D P A . . M L S T F K R W S A S R A A M T W G D L S A E E Q V P H A H  
 K G A 0 7 7 0 0 . 1 F I R E N A D A L I D A M V A K G G . . . N S G D I I T D V A Y D F E T I T I F A L I G V P N E . . M T D L V K K W A S R A A M T W G D L T D E E Q V P H A H  
 G A P 5 6 7 9 4 . 1 F I R Q N V V E L L E K M L A R P E . . . H R G D M V K D L A Y D F E T I T I L T L I G A D V S . . Q V D T F K R W S D S R A A M T W G D L S D E E Q I F P H A H  
 W P \_ 0 1 9 9 8 6 7 6 8 . 1 R I R E L A I N M I G G F Q A . D G . . . H A E M V R D L A Y D F A F V I F M L L G V P N E . . D V Q Q V K S W A E S R A A M T W G D L T D E E Q I V H A E  
 W P \_ 0 1 5 0 3 0 0 6 8 . 1 K I R E L A I N M I E D F A A . K G . . . K T N I I K D L A Y D F A Y V I F M L L G V P N E . . E V Q Q V K S W A E S R L L L T W G D L S E D D Q I V H A Q  
 W P \_ 0 0 9 1 8 4 7 7 9 . 1 E I R N I A I R M I E E L R A G N K . . . Q A E M I S E L A Y D F A L V I F K L L G V P D S . . D V A Q V K S W A E S R L L T W G D L D E D A Q M M H A E  
 W P \_ 0 1 5 6 6 4 2 2 1 . 1 E I K A I V N Q A I D G F A D R G H . . . A D F F R E F A Y D F A L V L F K L V G V P N M . . D V P R V K S W A V S R A L L T W G D L S D E E Q I V H A H  
 W P \_ 0 0 9 0 3 1 0 0 6 . 1 E I K A I V N Q A I D A F A A R G H . . . A D F F R E F A Y D F A L V L F K L V G I P N M . . D V P R V K S W A V S R A L L T W G D L S D E E Q V V H A R  
 W P \_ 0 0 6 6 1 4 2 5 7 . 1 E I K A I V N Q A I D A F A A R G H . . . A D F F R E F A Y D F A L V L F K L V G I P N M . . D V P R V K S W A V S R A L L T W G D L S D E E Q I V H A R  
 W P \_ 0 1 2 0 4 1 8 5 5 . 1 E I K A I V N R A I D T F A E R G H . . . A D F F R E F A Y D F A L V L F K L V G I P N I . . D V P R V K S W A V S R A L L T W G D L S D E E Q I V H A R  
 W P \_ 0 6 7 5 4 7 9 3 6 . 1 Q I E A I V D R H L N K I A V A G E . . . C D F F R D V A Y D F A L V L F A L M G I P D E . . D V P K V K W A A S R A L L T W G D L S D E E Q I F P L A E  
 W P \_ 0 1 3 9 2 6 2 1 9 . 1 D I R A L A I E M I E K F Q D . K K . . . H A E L V K E L Y Y D F A F V I F M L L G V P K E . . E V T Q V K W A I S R M M L T F S D T S E E E Q I F H A R  
 W P \_ 0 0 7 2 0 4 7 0 0 . 1 Q I E A I I D R H L T K I A A A G E . . . C D F F R D V A Y D F A L V L F A L M G I P D A . . D V P K V K W A A S R A L L T W G L S D E D O P L A H  
 W P \_ 0 0 9 8 0 9 9 7 5 . 1 K I E A I I D R T L N E A A E L G Q . . . D F F R Q V A Y P F A L V L F T M M G I P D E . . D V P K V K W A V S R A L V T W G L S D E E Q V V H A Q  
 W P \_ 0 6 4 7 5 0 5 6 6 . 1 Q I R E L I T T M I D R F A S R G H . . . A D L V E A L T H E F A L V I F R L L G I P D A . . D V P R V K W A A S R V F L N F G D L P V S E O V A H A E  
 W P \_ 0 3 7 6 6 4 3 8 8 . 1 K V W A K A T E L V D A I K . P G Q . . . V D L V S A L T Y P F A Y M I F T F I G F P D E . . D M D M L K S W C G N R I A F S W G R P S G D E O R E I A T  
 S C G 0 2 6 4 2 . 1 K V W A K A T E L V D A I K . P G Q . . . V D L V S A L T Y P F A Y M I F T F I G F P D E . . D M D M L K S W C G N R I A F S W G R P S G D E O R E I A T  
 W P \_ 0 3 0 4 9 7 7 9 6 . 1 K V W A K A T E L V D A I E . P G R . . . V D L V N A L T Y P F A Y M I F T F I G F P D E . . D M D M L K S W C G N R I A F S W G R P S A D E O R E I A T  
 W P \_ 0 1 4 1 5 8 2 7 9 . 1 K V W A K A T E L V D A V E . P G Q . . . V D L V A A L T Y P F A Y M I F T F I G F P D E . . D M D M L K S W C G N R I A F S W G R P S A D E O R E I A T  
 W P \_ 0 3 7 8 3 1 1 5 4 . 1 K V W A K A T E L V D A V E . P G Q . . . V D L V A A L T Y P F A Y M I F T F I G F P D E . . D M D M L K S W C G N R I A F S W G R P S A D E O R E I A T  
 W P \_ 0 3 0 8 8 2 0 3 5 . 1 K V W A K A T E L V D A V E . P G Q . . . V D L V A A L T Y P F A Y M I F T F I G F P D E . . D M D M L K S W C G N R I A F S W G R P S A G E O R E I A T  
 W P \_ 0 0 9 9 5 1 1 2 7 . 1 T I R A Y V T E M I D R L H Q D R . . . F D I V Q E V T F P F E A T I V F N L I G F P E S . . D M E M L K G L A I N R M A P T W G R S T E A E Q V R I A K

| CYP288A2       | α9   |      |     | α10  |                           |        | α11   |         |      |    |                   |        |      |
|----------------|------|------|-----|------|---------------------------|--------|-------|---------|------|----|-------------------|--------|------|
|                | 220  | *    | 230 | 240  | 250                       | 260    | 270   | 280     |      |    |                   |        |      |
| CYP288A2       | NLVE | YMQE | QR  | MVA  | DAHAH                     | GGDNI  | TADL  | VRAQ    | QE   | Q  | EITDHEIASLLYSLLF  | AGHETT | TTL  |
| WP_011013726.1 | NLVE | YMQE | QR  | MVA  | DAHAH                     | GGDNI  | TADL  | VRAQ    | QE   | Q  | EITDHEIASLLYSLLF  | AGHETT | TTL  |
| WP_060564075.1 | NLVE | YMQE | QR  | MVA  | DAHAH                     | GGDNI  | TADL  | VRAQ    | QE   | Q  | EITDHEIASLLYSLLF  | AGHETT | TTL  |
| WP_065366652.1 | NLVE | YMQE | QR  | MVA  | DAHAH                     | GGDNI  | TADL  | VRAQ    | QE   | Q  | EITDHEIASLLYSLLF  | AGHETT | TTL  |
| WP_003860615.1 | NLVE | YMQE | QR  | MVA  | DAHAH                     | GGDNI  | TADL  | VRAQ    | QE   | Q  | EITDHEIASLLYSLLF  | AGHETT | TTL  |
| WP_063967321.1 | NLVE | YMQE | QR  | MVA  | DAHAH                     | GGDNI  | TADL  | VRAQ    | QE   | Q  | EITDHEIASLLYSLLF  | AGHETT | TTL  |
| WP_038582779.1 | NLVE | YMQE | QR  | MVA  | DAHAH                     | GGDNI  | TADL  | VRAQ    | QE   | Q  | EITDHEIASLLYSLLF  | AGHETT | TTL  |
| WP_006287245.1 | NLVE | YMQE | QR  | MVA  | EAHEN                     | GGDNI  | TADL  | VRAQ    | QE   | Q  | EITDHEIASLLYSLLF  | AGHETT | TTL  |
| WP_044026924.1 | NLVE | YMQE | QR  | MVA  | EAHEN                     | GGDNI  | TADL  | VRAQ    | QE   | Q  | EITDHEIASLLYSLLF  | AGHETT | TTL  |
| WP_040966998.1 | NLVE | YMQE | QR  | MVA  | DAHAH                     | GGDNI  | TADL  | VRAQ    | QE   | Q  | EITDHEIASLLYSLLF  | AGHETT | TTL  |
| BAF53637.1     | NLVE | YMQE | QR  | MVA  | EAHEN                     | GGDNI  | TADL  | VRAQ    | QE   | Q  | EITDHEIASLLYSLLF  | AGHETT | TTL  |
| WP_003854399.1 | NLVE | YMQE | QR  | MVA  | EAHEN                     | GGDNI  | TADL  | VRAQ    | QE   | Q  | EITDHEIASLLYSLLF  | AGHETT | TTL  |
| BAU94954.1     | NLVE | YMQE | QR  | MVA  | DAHAH                     | GGDNI  | TADL  | VRAQ    | QE   | Q  | EITDHEIASLLYSLLF  | AGHETT | TTL  |
| WP_066564562.1 | NLVE | YMQE | QR  | MVA  | HAHEH                     | GGDNI  | TADL  | VRAQ    | ES   | Q  | EITDHEIASLLYSLLF  | AGHETT | TTL  |
| WP_035109760.1 | NLVE | YMQE | QR  | MVA  | DAHAN                     | GGDNI  | TADL  | VRAQ    | ES   | Q  | EITDHEIASLLYSLLF  | AGHETT | TTL  |
| EEW50177.1     | NLVE | YMQE | QR  | MVA  | DAHAN                     | GGDNI  | TADL  | VRAQ    | ES   | Q  | EITDHEIASLLYSLLF  | AGHETT | TTL  |
| BAC17372.1     | NLVE | YMQE | QR  | MVA  | DAHAN                     | GGDNI  | TADL  | VRAQ    | ES   | Q  | EITDHEIASLLYSLLF  | AGHETT | TTL  |
| WP_015399966.1 | SLVE | YMQE | QR  | MVA  | EAHAN                     | GGDSI  | TADL  | ARAQ    | EE   | Q  | EITDHEIASLLYSLLF  | AGHETT | TTL  |
| WP_010144948.1 | NLVE | YMQE | QR  | LVA  | EAHAH                     | GGDNI  | TADL  | VRTQ    | QE   | GG | EISDHEIASLLYSMLF  | AGHETT | TTL  |
| WP_026196155.1 | NLVE | YMAE | QR  | LVA  | EAHNS                     | PTDDI  | TSD   | LVRF    | SE   | GG | EISDHEIASLLYSLLF  | AGHETT | TTL  |
| WP_062861371.1 | NLVE | YMQE | CL  | SIVA | DAHEN                     | GGDSM  | TADL  | VKAC    | SE   | GA | EISDHEIASVLYSLLF  | AGHETT | TTL  |
| WP_039207235.1 | NLVE | YMQE | CL  | SIVA | DAHEN                     | GGDSM  | TADL  | VKAC    | SE   | GA | EISDHEIASVLYSLLF  | AGHETT | TTL  |
| WP_062241641.1 | NLVE | YMQE | CL  | SIVA | DAHEN                     | GGDSM  | TADL  | VTAQ    | SE   | GA | EISDHEIASVLYSLLF  | AGHETT | TTL  |
| WP_011691841.1 | NLVE | YMQE | CL  | RLV  | KVAHEQ                    | GGDNI  | TADL  | VKSC    | QE   | GA | EISDHEIASVLYSLLF  | AGHETT | TTL  |
| WP_024367961.1 | NLVE | YMQE | CL  | RLV  | KVAHEE                    | GGDNI  | TADL  | VKSC    | QE   | GA | EISDHEIASVLYSLLF  | AGHETT | TTL  |
| WP_005273409.1 | NLVE | YMQE | CL  | RLV  | VAAHEE                    | GGDNI  | TADL  | VKAC    | QQ   | GA | EITDHEIASVLYSMLF  | AGHETT | TTL  |
| WP_043481247.1 | NLVE | YMQE | CL  | RLV  | VAAHEE                    | GGDNI  | TADL  | VKSC    | QE   | GA | EISDHEIASVLYSLLF  | AGHETT | TTL  |
| WP_055806675.1 | NLVE | YMQE | CL  | RLV  | VAAHEE                    | GGDNI  | TADL  | VKSC    | QE   | GA | EISDHEIASVLYSLLF  | AGHETT | TTL  |
| WP_062289581.1 | NLVE | YMQE | CL  | RLV  | VAAHEE                    | GGDNI  | TADL  | VAAQ    | AG   | GA | EITDHEIASVLYSLLF  | AGHETT | TTL  |
| WP_028269402.1 | NLVE | YMQE | CL  | RLV  | AAHEK                     | GGDNI  | TADL  | VKAC    | QQ   | GA | EISDHEIASVLYSLLF  | AGHETT | TTL  |
| WP_028276640.1 | NLVE | YMQE | CL  | RLV  | VAAHEE                    | GGDNI  | TADL  | VKAC    | QQ   | GA | EISDHEIASVLYSLLF  | AGHETT | TTL  |
| WP_026539569.1 | NLVE | YMQE | CL  | RLV  | VAAHEE                    | GGDNI  | TADL  | VKSC    | QE   | GA | EISDHEIASVLYSLLF  | AGHETT | TTL  |
| WP_018775007.1 | NLVE | YMQE | CL  | RLV  | VAAHEE                    | GGDNI  | TADL  | VKSC    | QE   | GA | EISDHEIASVLYSLLF  | AGHETT | TTL  |
| WP_013600843.1 | NLVE | YMQE | CL  | RLV  | VAAHEE                    | GGDNI  | TADL  | VKAC    | QQ   | GA | EISDHEIASVLYSLLF  | AGHETT | TTL  |
| WP_028265717.1 | NLVE | YMQE | CL  | RLV  | VAAHDD                    | GGDNI  | TADL  | VKSC    | QQ   | GA | EISDHEIASVLYSLLF  | AGHETT | TTL  |
| WP_068734283.1 | NLVE | YMAE | CL  | RLV  | AAHEH                     | GGDNI  | TADL  | VKAC    | SD   | GA | EITDHEIASLLYSLLF  | AGHETT | TTL  |
| WP_069950213.1 | NLVE | YMQE | CL  | RLV  | KVAHEE                    | GGDNI  | TADL  | VKSC    | QE   | GA | EISDHEIASVLYSLLF  | AGHETT | TTL  |
| WP_007269721.1 | NLVE | YMAE | CL  | RLV  | AAHKKH                    | GGDNI  | TADL  | VKAC    | TE   | GA | EITDHEIASLLYSLLF  | AGHETT | TTL  |
| ATS67786.2     | NLVE | YMAE | CL  | RLV  | AAHKKH                    | GGDNI  | TADL  | VKAC    | TE   | GA | EITDHEIASLLYSLLF  | AGHETT | TTL  |
| WP_066143328.1 | NLVE | YMAE | CL  | RLV  | AAHAT                     | EGDSI  | TADL  | VKAC    | NE   | GA | EITDHEIASLLYSLLF  | AGHETT | TTL  |
| WP_038992926.1 | NLVE | YMAE | CL  | RLV  | AAHAT                     | EGDSI  | TADL  | VKAC    | NE   | GA | EITDHEIASLLYSLLF  | AGHETT | TTL  |
| WP_047120326.1 | NLVE | YMAE | CL  | RLV  | AAHAA                     | GGDSI  | TADL  | VQAC    | KD   | GA | EITDHEIASLLYSLLF  | AGHETT | TTL  |
| WP_053799000.1 | NLVE | YMAE | CL  | RLV  | AAHAA                     | GGDNI  | TADL  | VAAQ    | RD   | GA | EITDHEIASLLYSLLF  | AGHETT | TTL  |
| WP_040795180.1 | NLVE | YMAE | CL  | RLV  | AAHET                     | RPDSI  | LVG   | DMIRMG  | AD   | GP | EITDHEIASLCYSLF   | AGHETT | TTL  |
| WP_064080112.1 | NLVE | YMAE | CL  | RLV  | AAHEK                     | QPDSI  | LIG   | DLVRAQ  | AA   | GP | EISDHEIASVGYSLF   | AGHETT | TTL  |
| WP_045191440.1 | NLVE | YMAE | CL  | RLV  | AAHEK                     | QPDSI  | LVG   | DLVRAQ  | QA   | GP | EISDHEIASLCYSLF   | AGHETT | TTL  |
| WP_066501301.1 | NLVE | YMAE | CL  | RLV  | AAHAE                     | GGDNI  | TADL  | VTAQ    | KD   | GA | EISDHEIASVAYSLF   | AGHETT | TTL  |
| WP_052024002.1 | NLVE | YMAE | CL  | RLV  | AAHEK                     | QPDSI  | LIG   | DLVRAQ  | AA   | GP | EISDHEIASVGYSLF   | AGHETT | TTL  |
| WP_026453050.1 | NLVE | YMAE | CL  | RLV  | AAHGN                     | ERDSI  | LVG   | DLVRAQ  | RD   | GP | EITDHEIASVCYSLF   | AGHETT | TTL  |
| WP_067137052.1 | NLVE | YMAE | CL  | RLV  | AAHEH                     | ERGSI  | LVG   | DLVRAQ  | AA   | GP | EITDHEIASVYSLF    | AGHETT | TTL  |
| ELB90053.1     | NLVE | YMAE | CL  | RLV  | AAHEK                     | QPDSI  | LIG   | DLVRAQ  | AA   | GP | EISDHEIASVGYSLF   | AGHETT | TTL  |
| WP_029339819.1 | NLVE | YMAE | CL  | RLV  | AAHAK                     | PRDSI  | LVG   | DLIRAQ  | RA   | GP | EITDHEIASVCYSLF   | AGHETT | TTL  |
| WP_055597530.1 | NLVE | YMAE | CL  | RLV  | AAHET                     | EPDSI  | LVG   | DMVRMG  | AE   | GP | EISDHEIASVCYSLF   | AGHETT | TTL  |
| WP_066941537.1 | NLVE | YMAE | CL  | RLV  | AAHEH                     | ERGSI  | LVG   | DLVRAQ  | AA   | GP | EITDHEIASVYSLF    | AGHETT | TTL  |
| WP_040168028.1 | NLVE | YMAE | CL  | RLV  | AAHES                     | GGDNI  | TADL  | VVEAQ   | KA   | GA | EITDHEIASLCYSLF   | AGHETT | TTL  |
| WP_053293979.1 | NLVE | YMAE | CL  | RLV  | AAHET                     | ERDSI  | LVG   | DMVRMG  | AA   | GP | EISDHEIASVCYSLF   | AGHETT | TTL  |
| WP_061252837.1 | NLVE | YMAE | CL  | RLV  | AAHEH                     | ERGSI  | LVG   | DLVRAQ  | AA   | GP | EITDHEIASVYSLF    | AGHETT | TTL  |
| WP_006335139.1 | NLVE | YMAE | CL  | RLV  | AAHEN                     | PRDSI  | LVG   | DLVRAQ  | HE   | GP | EISDHEIASVCYSLF   | AGHETT | TTL  |
| WP_020389625.1 | NLVE | YMAE | CL  | RLV  | AAHET                     | PDPSI  | LVG   | DLVRAQ  | RD   | GP | EITDHEIASVCYSLF   | AGHETT | TTL  |
| WP_053447282.1 | NLVE | YMQE | CL  | RLV  | AAHRE                     | GGDNI  | TADL  | VVAC    | QQ   | GA | EITDHEIASVLYSLLF  | AGHETT | TTL  |
| WP_024368481.1 | NLVE | YMQE | CL  | RLV  | VAAHEE                    | AGDSI  | TADL  | VKAC    | SE   | GA | EISDHEIASVLYSLLF  | AGHETT | TTL  |
| WP_022870166.1 | NLVE | YMAE | CL  | RLV  | VAAHEE                    | GGDNI  | TADL  | MVRDQ   | EA   | GA | EITDHEIASVLYSLLF  | AGHETT | TTL  |
| ODT11970.1     | NLVE | YMAE | CL  | RLV  | VAAHQ                     | GGDSI  | TADL  | VVEAQ   | GA   | GA | EITDHEIASLCYSLF   | AGHETT | TTL  |
| WP_043055803.1 | NLVE | YMAE | CL  | RLV  | VAAHEE                    | GGDNI  | TADL  | MVRDQ   | EN   | GA | EITDHEIASVLYSLLF  | AGHETT | TTL  |
| WP_056728828.1 | NLVE | YMAE | CL  | RLV  | VAAHER                    | GGDNI  | TADL  | VVEAQ   | DA   | GA | EISDHEIASLCYSLF   | AGHETT | TTL  |
| BAU99498.1     | NLVE | YMAE | CL  | RLV  | VAAHAK                    | GGDNI  | TADL  | VVAC    | AE   | GA | EISDHEIASVLYSMLF  | AGHETT | TTL  |
| WP_035877878.1 | NLVE | YMAE | CL  | RLV  | VAAHEALAAHEALAAQKDAADDEAV | TDNI   | LVADL | VRAQ    | LA   | GA | EISDHEIASVLYSLLF  | AGHETT | TTL  |
| SBT38743.1     | RLVE | YMAE | CL  | RLV  | VAAEQS                    | ERDSI  | LVG   | DLVRAQ  | RG   | GP | EISDHEIASVCYSLF   | AGHETT | TAL  |
| KGA07700.1     | NMVA | YMSF | QK  | LVA  | DAKVT                     | PGDNI  | VT    | DLVNLQ  | AA   | GE | KISDHEIASVLYSLLF  | AGHETT | TTL  |
| GAP56794.1     | NLVE | YMQE | CL  | RLV  | KVAHAE                    | GGDNI  | TADL  | VKSC    | QE   | GA | EISDHEIASVLYSLLF  | AGHETT | TTL  |
| WP_019986768.1 | NMIX | YWNQ | QNL | VK   | LRHEN                     | PTDDI  | FG    | DLVRLQ  | AE   | GE | EISDREIAAMCYSLF   | AGHETT | TSL  |
| WP_015030068.1 | NMIX | YWNQ | QGL | V    | KRKEN                     | PTDDI  | FG    | DLVRYQ  | AE   | GE | EISDREIAAMCYSLF   | AGHETT | TSL  |
| WP_009184779.1 | NMIX | YWNQ | QK  | LVS  | DRKEK                     | MQDDI  | FG    | DLVVLC  | AE   | GE | EITDREIAATCYSLF   | AGHETT | TSL  |
| WP_015664221.1 | NMVE | YWNQ | QRL | V    | QRHDD                     | PTDDI  | FG    | DLVRLQ  | KD   | GA | EISDREIAGVLYSALF  | AGHETT | TTL  |
| WP_009031006.1 | NMVD | YWNQ | QRL | V    | QRHDD                     | PTDDI  | FG    | DLVRLQ  | KE   | GA | EISDREIAGVLYSALF  | AGHETT | TTL  |
| WP_006614257.1 | NMVE | YWNQ | QR  | L    | QRHDD                     | PTDDI  | FG    | DLVRLQ  | KD   | GA | EISDREIAGVLYSALF  | AGHETT | TTL  |
| WP_012041855.1 | NMVE | YWNQ | CR  | L    | QRHDD                     | PTDDI  | FG    | DLVRLQ  | KD   | GA | EISDREIAGVLYSALF  | AGHETT | TTL  |
| WP_067547936.1 | KMVD | YWDY | CR  | G    | VAARKEV                   | PGDDF  | FP    | DMVQAC  | AN   | GA | EITDREIAGLMYSVLF  | AGHETT | TTL  |
| WP_013926219.1 | QVVK | YWDY | CR  | E    | MVAARRKQV                 | LGDDF  | FP    | DLVRLQ  | QE   | GE | EISDREIAAMCYNLQF  | AGHETT | TSL  |
| WP_007204700.1 | KMVA | YWSY | CR  | L    | VAAARKEV                  | PGDDF  | FP    | DMVRTC  | AE   | GG | EITDREIAGLMYSVLF  | AGHETT | TTL  |
| WP_009809975.1 | GVD  | YWAY | CR  | L    | VDAARREN                  | PGDDF  | FP    | DLKAC   | AE   | GA | EITDREIAGLMYSTLF  | AGHETT | TTL  |
| WP_064750566.1 | NLVR | YWRQ | C   | E    | LTEARRKE                  | PRDDI  | FS    | ALVALD  | DAS  | .. | ISLDEIAGLVYGGQLT  | AGHETT | TSAL |
| WP_037664388.1 | NMTH | YWEY | CEN | F    | VARRAA                    | FVDDFT | S     | DLIRIRE | ENF  | E  | ALSLEDITNVAYGLSF  | AGHETT | TSF  |
| SCG02642.1     | NMTH | YWEY | CEN | F    | VARRAA                    | FVDDFT | S     | DLIRIRE | ENF  | E  | ALSLEDITNVAYGLSF  | AGHETT | TSF  |
| WP_030497796.1 | NMTH | YWEY | CEN | F    | VARRAA                    | FVDDFT | S     | DLIRIRE | ENF  | E  | ALSLEDITNVAYGLSF  | AGHETT | TSF  |
| WP_014158279.1 | NMTH | YWKY | CEN | F    | VARRAA                    | FVDDFT | S     | DLVRI   | HLAD | E  | DALSLEDITNVAYGLSF | AGHETT | TSF  |
| WP_037831154.1 | NMTH | YWKY | CEN | F    | VARRAA                    | FVDDFT | S     | DLVRI   | HLAD | E  | DALSLEDITNVAYGLSF | AGHETT | TSF  |
| WP_030882035.1 | NMTH | YWKY | CEN | F    | VARRAA                    | FVDDFT | S     | DLVRI   | HLAD | E  | DALSLEDITNVAYGLSF | AGHETT | TSF  |
| WP_009951127.1 | NQVD | YXQY | C   | E    | FVARRAA                   | PKDDFT | S     | DLIRTH  | HLAD | E  | ELSVDEITNVVHALS   | AGHETT | TNV  |

| CYP28A2        | α12 |     |     |     |     |     |     |     |     |     | α13 |     |     |     |     |     |     |     |     |     | η2  |     |     |     |     |     |     |     |     |     | α14 |     |     |     |     |     |     |     |     |     | β5  |     |     |     |     |     |     |     |     |     | β6  |     |     |     |     |     |     |     |     |     | β7  |     |     |     |     |     |     |     |     |     | β8  |     |      |   |   |   |   |  |  |  | α15 |  |  |  |  |  |  |  |  |  |
|----------------|-----|-----|-----|-----|-----|-----|-----|-----|-----|-----|-----|-----|-----|-----|-----|-----|-----|-----|-----|-----|-----|-----|-----|-----|-----|-----|-----|-----|-----|-----|-----|-----|-----|-----|-----|-----|-----|-----|-----|-----|-----|-----|-----|-----|-----|-----|-----|-----|-----|-----|-----|-----|-----|-----|-----|-----|-----|-----|-----|-----|-----|-----|-----|-----|-----|-----|-----|-----|-----|-----|-----|-----|------|---|---|---|---|--|--|--|-----|--|--|--|--|--|--|--|--|--|
|                | 280 | 290 | 300 | 310 | 320 | 330 | 340 | 350 | 360 | 370 | 380 | 390 | 400 | 410 | 420 | 430 | 440 | 450 | 460 | 470 | 480 | 490 | 500 | 510 | 520 | 530 | 540 | 550 | 560 | 570 | 580 | 590 | 600 | 610 | 620 | 630 | 640 | 650 | 660 | 670 | 680 | 690 | 700 | 710 | 720 | 730 | 740 | 750 | 760 | 770 | 780 | 790 | 800 | 810 | 820 | 830 | 840 | 850 | 860 | 870 | 880 | 890 | 900 | 910 | 920 | 930 | 940 | 950 | 960 | 970 | 980 | 990 | 1000 |   |   |   |   |  |  |  |     |  |  |  |  |  |  |  |  |  |
| CYP28A2        | S   | S   | N   | C   | F   | V   | L   | L   | D   | H   | F   | Q   | W   | Q   | A   | I   | L   | E   | N   | F   | K   | I   | P   | A   | V   | D   | E   | V   | L   | R   | S   | G   | S   | I   | V   | G   | W   | R   | R   | K   | A   | L   | K   | D   | T   | E   | I   | G   | G   | V   | A   | I   | K   | E   | D   | G   | V   | L   | L   | M   | G   | S   | A   | N   | R   | D   | E   | A   | R   | F   | E   | N   | G    | E |   |   |   |  |  |  |     |  |  |  |  |  |  |  |  |  |
| WP_011013726.1 | S   | S   | N   | C   | F   | V   | L   | L   | D   | H   | F   | Q   | W   | Q   | A   | I   | L   | E   | N   | F   | K   | I   | P   | A   | V   | D   | E   | V   | L   | R   | S   | G   | S   | I   | V   | G   | W   | R   | R   | K   | A   | L   | K   | D   | T   | E   | I   | G   | G   | V   | A   | I   | K   | E   | D   | G   | V   | L   | L   | M   | G   | S   | A   | N   | R   | D   | E   | A   | R   | F   | E   | N   | G    | E |   |   |   |  |  |  |     |  |  |  |  |  |  |  |  |  |
| WP_060564075.1 | S   | S   | N   | C   | F   | V   | L   | L   | D   | H   | F   | Q   | W   | Q   | A   | I   | L   | E   | N   | F   | K   | I   | P   | A   | V   | D   | E   | V   | L   | R   | S   | G   | S   | I   | V   | G   | W   | R   | R   | K   | A   | L   | K   | D   | T   | E   | I   | G   | G   | V   | A   | I   | K   | E   | D   | G   | V   | L   | L   | M   | G   | S   | A   | N   | R   | D   | E   | A   | R   | F   | E   | N   | G    | E |   |   |   |  |  |  |     |  |  |  |  |  |  |  |  |  |
| WP_065366652.1 | S   | S   | N   | C   | F   | V   | L   | L   | D   | H   | F   | Q   | W   | Q   | A   | I   | L   | E   | N   | F   | K   | I   | P   | A   | V   | D   | E   | V   | L   | R   | S   | G   | S   | I   | V   | G   | W   | R   | R   | K   | A   | L   | K   | D   | T   | E   | I   | G   | G   | V   | A   | I   | K   | E   | D   | G   | V   | L   | L   | M   | G   | S   | A   | N   | R   | D   | E   | A   | R   | F   | E   | N   | G    | E |   |   |   |  |  |  |     |  |  |  |  |  |  |  |  |  |
| WP_003860615.1 | S   | S   | N   | C   | F   | V   | L   | L   | D   | H   | F   | Q   | W   | Q   | A   | I   | L   | E   | N   | F   | K   | I   | P   | A   | V   | D   | E   | V   | L   | R   | S   | G   | S   | I   | V   | G   | W   | R   | R   | K   | A   | L   | K   | D   | T   | E   | I   | G   | G   | V   | A   | I   | K   | E   | D   | G   | V   | L   | L   | M   | G   | S   | A   | N   | R   | D   | E   | A   | R   | F   | E   | N   | G    | E |   |   |   |  |  |  |     |  |  |  |  |  |  |  |  |  |
| WP_063967321.1 | S   | S   | N   | C   | F   | V   | L   | L   | D   | H   | F   | Q   | W   | Q   | A   | I   | L   | E   | N   | F   | K   | I   | P   | A   | V   | D   | E   | V   | L   | R   | S   | G   | S   | I   | V   | G   | W   | R   | R   | K   | A   | L   | K   | D   | T   | E   | I   | G   | G   | V   | A   | I   | K   | E   | D   | G   | V   | L   | L   | M   | G   | S   | A   | N   | R   | D   | E   | A   | R   | F   | E   | N   | G    | E |   |   |   |  |  |  |     |  |  |  |  |  |  |  |  |  |
| WP_038582779.1 | S   | S   | N   | C   | F   | V   | L   | L   | D   | H   | F   | Q   | W   | Q   | A   | I   | L   | E   | N   | F   | K   | I   | P   | A   | V   | D   | E   | V   | L   | R   | S   | G   | S   | I   | V   | G   | W   | R   | R   | K   | A   | L   | K   | D   | T   | E   | I   | G   | G   | V   | A   | I   | K   | E   | D   | G   | V   | L   | L   | M   | G   | S   | A   | N   | R   | D   | E   | A   | R   | F   | E   | N   | G    | E |   |   |   |  |  |  |     |  |  |  |  |  |  |  |  |  |
| WP_006287245.1 | S   | S   | N   | C   | F   | V   | L   | L   | D   | H   | F   | Q   | W   | Q   | A   | I   | L   | E   | N   | F   | K   | I   | P   | A   | V   | D   | E   | V   | L   | R   | S   | G   | S   | I   | V   | G   | W   | R   | R   | K   | A   | L   | K   | D   | T   | E   | I   | G   | G   | V   | A   | I   | K   | E   | D   | G   | V   | L   | L   | M   | G   | S   | A   | N   | R   | D   | E   | A   | R   | F   | E   | N   | G    | E |   |   |   |  |  |  |     |  |  |  |  |  |  |  |  |  |
| WP_044026924.1 | S   | S   | N   | C   | F   | V   | L   | L   | D   | H   | F   | Q   | W   | Q   | A   | I   | L   | E   | N   | F   | K   | I   | P   | A   | V   | D   | E   | V   | L   | R   | S   | G   | S   | I   | V   | G   | W   | R   | R   | K   | A   | L   | K   | D   | T   | E   | I   | G   | G   | V   | A   | I   | K   | E   | D   | G   | V   | L   | L   | M   | G   | S   | A   | N   | R   | D   | E   | A   | R   | F   | E   | N   | G    | E |   |   |   |  |  |  |     |  |  |  |  |  |  |  |  |  |
| WP_040966998.1 | S   | S   | N   | C   | F   | V   | L   | L   | D   | H   | F   | Q   | W   | Q   | A   | I   | L   | E   | N   | F   | K   | I   | P   | A   | V   | D   | E   | V   | L   | R   | S   | G   | S   | I   | V   | G   | W   | R   | R   | K   | A   | L   | K   | D   | T   | E   | I   | G   | G   | V   | A   | I   | K   | E   | D   | G   | V   | L   | L   | M   | G   | S   | A   | N   | R   | D   | E   | A   | R   | F   | E   | N   | G    | E |   |   |   |  |  |  |     |  |  |  |  |  |  |  |  |  |
| BAF53637.1     | S   | S   | N   | C   | F   | V   | L   | L   | D   | H   | F   | Q   | W   | Q   | A   | I   | L   | E   | N   | F   | K   | I   | P   | A   | V   | D   | E   | V   | L   | R   | S   | G   | S   | I   | V   | G   | W   | R   | R   | K   | A   | L   | K   | D   | T   | E   | I   | G   | G   | V   | A   | I   | K   | E   | D   | G   | V   | L   | L   | M   | G   | S   | A   | N   | R   | D   | E   | A   | R   | F   | E   | N   | G    | E |   |   |   |  |  |  |     |  |  |  |  |  |  |  |  |  |
| WP_003854399.1 | S   | S   | N   | C   | F   | V   | L   | L   | D   | H   | F   | Q   | W   | Q   | A   | I   | L   | E   | N   | F   | K   | I   | P   | A   | V   | D   | E   | V   | L   | R   | S   | G   | S   | I   | V   | G   | W   | R   | R   | K   | A   | L   | K   | D   | T   | E   | I   | G   | G   | V   | A   | I   | K   | E   | D   | G   | V   | L   | L   | M   | G   | S   | A   | N   | R   | D   | E   | A   | R   | F   | E   | N   | G    | E |   |   |   |  |  |  |     |  |  |  |  |  |  |  |  |  |
| BAU94954.1     | S   | S   | N   | C   | F   | V   | L   | L   | D   | H   | F   | Q   | W   | Q   | A   | I   | L   | E   | N   | F   | K   | I   | P   | A   | V   | D   | E   | V   | L   | R   | S   | G   | S   | I   | V   | G   | W   | R   | R   | K   | A   | L   | K   | D   | T   | E   | I   | G   | G   | V   | A   | I   | K   | E   | D   | G   | V   | L   | L   | M   | G   | S   | A   | N   | R   | D   | E   | A   | R   | F   | E   | N   | G    | E |   |   |   |  |  |  |     |  |  |  |  |  |  |  |  |  |
| WP_066564562.1 | S   | S   | N   | C   | F   | V   | L   | L   | D   | H   | F   | Q   | W   | Q   | A   | I   | L   | E   | N   | F   | K   | I   | P   | A   | V   | D   | E   | V   | L   | R   | S   | G   | S   | I   | V   | G   | W   | R   | R   | K   | A   | L   | K   | D   | T   | E   | I   | G   | G   | V   | A   | I   | K   | E   | D   | G   | V   | L   | L   | M   | G   | S   | A   | N   | R   | D   | E   | A   | R   | F   | E   | N   | G    | E |   |   |   |  |  |  |     |  |  |  |  |  |  |  |  |  |
| WP_035109760.1 | S   | S   | N   | C   | F   | V   | L   | L   | D   | H   | F   | Q   | W   | Q   | A   | I   | L   | E   | N   | F   | K   | I   | P   | A   | V   | D   | E   | V   | L   | R   | S   | G   | S   | I   | V   | G   | W   | R   | R   | K   | A   | L   | K   | D   | T   | E   | I   | G   | G   | V   | A   | I   | K   | E   | D   | G   | V   | L   | L   | M   | G   | S   | A   | N   | R   | D   | E   | A   | R   | F   | E   | N   | G    | E |   |   |   |  |  |  |     |  |  |  |  |  |  |  |  |  |
| EEW50177.1     | S   | S   | N   | C   | F   | V   | L   | L   | D   | H   | F   | Q   | W   | Q   | A   | I   | L   | E   | N   | F   | K   | I   | P   | A   | V   | D   | E   | V   | L   | R   | S   | G   | S   | I   | V   | G   | W   | R   | R   | K   | A   | L   | K   | D   | T   | E   | I   | G   | G   | V   | A   | I   | K   | E   | D   | G   | V   | L   | L   | M   | G   | S   | A   | N   | R   | D   | E   | A   | R   | F   | E   | N   | G    | E |   |   |   |  |  |  |     |  |  |  |  |  |  |  |  |  |
| BAC17372.1     | S   | S   | N   | C   | F   | V   | L   | L   | D   | H   | F   | Q   | W   | Q   | A   | I   | L   | E   | N   | F   | K   | I   | P   | A   | V   | D   | E   | V   | L   | R   | S   | G   | S   | I   | V   | G   | W   | R   | R   | K   | A   | L   | K   | D   | T   | E   | I   | G   | G   | V   | A   | I   | K   | E   | D   | G   | V   | L   | L   | M   | G   | S   | A   | N   | R   | D   | E   | A   | R   | F   | E   | N   | G    | E |   |   |   |  |  |  |     |  |  |  |  |  |  |  |  |  |
| WP_015399966.1 | A   | N   | S   | F   | R   | V   | L   | L   | I   | G   | H   | R   | E   | Q   | W   | E   | T   | L   | I   | D   | N   | F   | K   | K   | T   | G   | A   | V   | D   | E   | V   | L   | R   | S   | G   | S   | I   | V   | G   | W   | R   | R   | K   | A   | L   | K   | D   | T   | E   | V   | G   | G   | V   | E   | I   | A   | K   | D   | G   | V   | L   | L   | M   | G   | S   | A   | N   | R   | D   | E   | A   | R   | F    | E | N | G | E |  |  |  |     |  |  |  |  |  |  |  |  |  |
| WP_010144948.1 | S   | S   | N   | C   | F   | V   | L   | L   | D   | H   | F   | Q   | W   | Q   | A   | I   | L   | E   | N   | F   | K   | I   | P   | A   | V   | D   | E   | V   | L   | R   | S   | G   | S   | I   | V   | G   | W   | R   | R   | K   | A   | L   | K   | D   | T   | E   | I   | G   | G   | V   | A   | I   | K   | E   | D   | G   | V   | L   | L   | M   | G   | S   | A   | N   | R   | D   | E   | A   | R   | F   | E   | N   | G    | E |   |   |   |  |  |  |     |  |  |  |  |  |  |  |  |  |
| WP_026196155.1 | S   | S   | N   | C   | F   | V   | L   | L   | D   | H   | F   | Q   | W   | Q   | A   | I   | L   | E   | N   | F   | K   | I   | P   | A   | V   | D   | E   | V   | L   | R   | S   | G   | S   | I   | V   | G   | W   | R   | R   | K   | A   | L   | K   | D   | T   | E   | I   | S   | G   | K   | I   | K   | D   | G   | V   | L   | L   | M   | G   | S   | A   | N   | R   | D   | E   | A   | R   | F   | E   | N   | G   | E   |      |   |   |   |   |  |  |  |     |  |  |  |  |  |  |  |  |  |
| WP_062861371.1 | G   | N   | T   | L   | R   | V   | L   | L   | A   | H   | P   | D   | Q   | W   | A   | V   | I   | D   | E   | K   | K   | I   | P   | A   | V   | D   | E   | V   | L   | R   | S   | G   | S   | I   | V   | G   | W   | R   | R   | K   | A   | L   | K   | D   | T   | E   | V   | G   | G   | V   | K   | I   | A   | E   | D   | E   | L   | L   | L   | M   | G   | S   | A   | N   | R   | D   | E   | A   | R   | F   | E   | N   | G    | E |   |   |   |  |  |  |     |  |  |  |  |  |  |  |  |  |
| WP_039207235.1 | G   | N   | T   | L   | R   | V   | L   | L   | A   | H   | P   | D   | Q   | W   | A   | V   | I   | D   | E   | K   | K   | I   | P   | A   | V   | D   | E   | V   | L   | R   | S   | G   | S   | I   | V   | G   | W   | R   | R   | K   | A   | L   | K   | D   | T   | E   | V   | G   | G   | V   | K   | I   | A   | E   | D   | E   | L   | L   | L   | M   | G   | S   | A   | N   | R   | D   | E   | A   | R   | F   | E   | N   | G    | E |   |   |   |  |  |  |     |  |  |  |  |  |  |  |  |  |
| WP_062241641.1 | G   | N   | T   | L   | R   | V   | L   | L   | A   | H   | P   | D   | Q   | W   | A   | V   | I   | D   | E   | K   | K   | I   | P   | A   | V   | D   | E   | V   | L   | R   | S   | G   | S   | I   | V   | G   | W   | R   | R   | K   | A   | L   | K   | D   | T   | E   | V   | G   | G   | V   | K   | I   | A   | E   | D   | E   | L   | L   | L   | M   | G   | S   | A   | N   | R   | D   | E   | A   | R   | F   | E   | N   | G    | E |   |   |   |  |  |  |     |  |  |  |  |  |  |  |  |  |
| WP_011691841.1 | S   | N   | A   | L   | R   | E   | L   | L   | A   | R   | P   | E   | Q   | W   | Q   | L   | V   | E   | D   | P   | K   | K   | I   | P   | A   | V   | D   | E   | V   | L   | R   | S   | G   | S   | I   | V   | G   | W   | R   | R   | K   | A   | L   | K   | D   | T   | E   | V   | G   | G   | V   | I   | E   | E   | G   | A   | C   | L   | L   | L   | M   | G   | S   | A   | N   | R   | D   | E   | A   | R   | F   | E   | N    | G | E |   |   |  |  |  |     |  |  |  |  |  |  |  |  |  |
| WP_024367961.1 | S   | N   | A   | L   | R   | E   | L   | L   | A   | R   | P   | E   | Q   | W   | Q   | L   | V   | E   | D   | P   | K   | K   | I   | P   | A   | V   | D   | E   | V   | L   | R   | S   | G   | S   | I   | V   | G   | W   | R   | R   | K   | A   | L   | K   | D   | T   | E   | V   | G   | G   | V   | I   | E   | E   | G   | A   | C   | L   | L   | L   | M   | G   | S   | A   | N   | R   | D   | E   | A   | R   | F   | E   | N    | G | E |   |   |  |  |  |     |  |  |  |  |  |  |  |  |  |
| WP_005273409.1 | S   | N   | A   | L   | R   | E   | L   | L   | A   | R   | P   | E   | Q   | W   | Q   | L   | V   | E   | D   | P   | K   | K   | I   | P   | A   | V   | D   | E   | V   | L   | R   | S   | G   | S   | I   | V   | G   | W   | R   | R   | K   | A   | L   | K   | D   | T   | E   | V   | G   | G   | V   | I   | E   | E   | G   | A   | C   | L   | L   | L   | M   | G   | S   | A   | N   | R   | D   | E   | A   | R   | F   | E   | N    | G | E |   |   |  |  |  |     |  |  |  |  |  |  |  |  |  |
| WP_043481247.1 | S   | N   | A   | L   | R   | E   | L   | L   | A   | R   | P   | E   | Q   | W   | Q   | L   | V   | E   | D   | P   | K   | K   | I   | P   | A   | V   | D   | E   | V   | L   | R   | S   | G   | S   | I   | V   | G   | W   | R   | R   | K   | A   | L   | K   | D   | T   | E   | V   | G   | G   | V   | I   | E   | E   | G   | A   | C   | L   | L   | L   | M   | G   | S   | A   | N   | R   | D   | E   | A   | R   | F   | E   | N    | G | E |   |   |  |  |  |     |  |  |  |  |  |  |  |  |  |
| WP_055806675.1 | S   | N   | A   | L   | R   | E   | L   | L   | A   | R   | P   | E   | Q   | W   | Q   | L   | V   | E   | D   | P   | K   | K   | I   | P   | A   | V   | D   | E   | V   | L   | R   | S   | G   | S   | I   | V   | G   | W   | R   | R   | K   | A   | L   | K   | D   | T   | E   | V   | G   | G   | V   | I   | E   | E   | G   | A   | C   | L   | L   | L   | M   | G   | S   | A   | N   | R   | D   | E   | A   | R   | F   | E   | N    | G | E |   |   |  |  |  |     |  |  |  |  |  |  |  |  |  |
| WP_062289581.1 | S   | N   | C   | F   | V   | L   | L   | D   | H   | F   | Q   | W   | Q   | A   | I   | L   | E   | N   | F   | K   | I   | P   | A   | V   | D   | E   | V   | L   | R   | S   | G   | S   | I   | V   | G   | W   | R   | R   | K   | A   | L   | K   | D   | T   | E   | I   | G   | G   | V   | A   | I   | K   | E   | D   | G   | V   | L   | L   | M   | G   | S   | A   | N   | R   | D   | E   | A   | R   | F   | E   | N   |     |      |   |   |   |   |  |  |  |     |  |  |  |  |  |  |  |  |  |



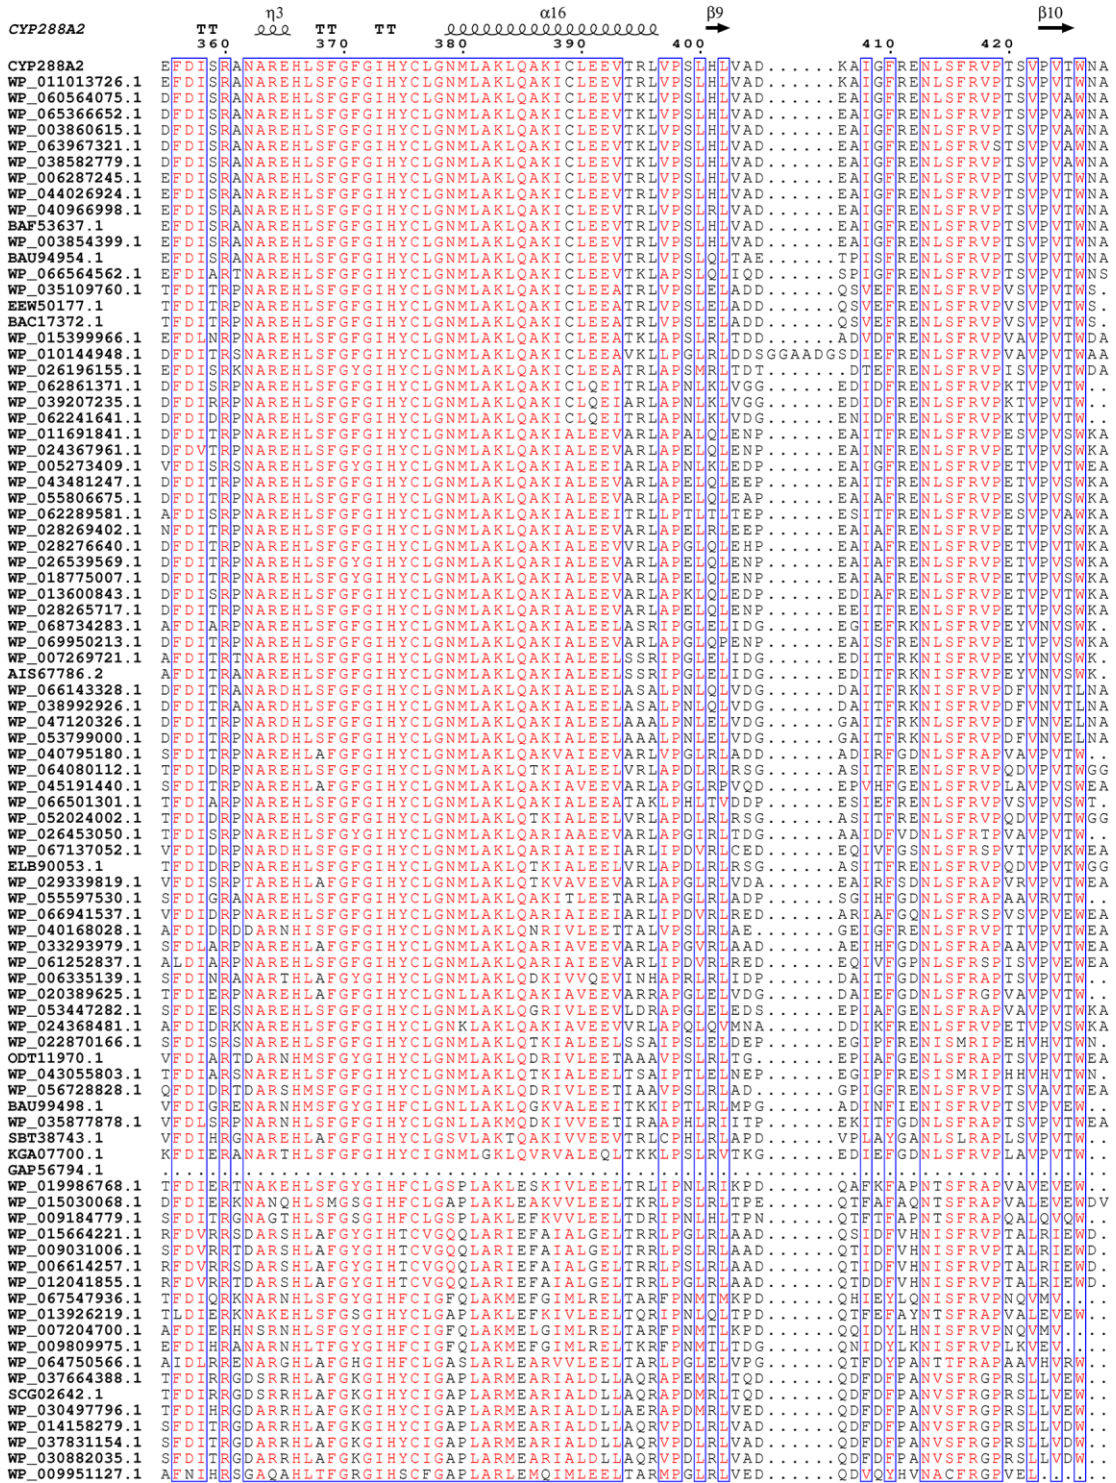

Fig. S31. Protein sequence alignment of CreJ homologues from diverse genera of microorganisms. Conserved residues are highlighted in white display with red background.

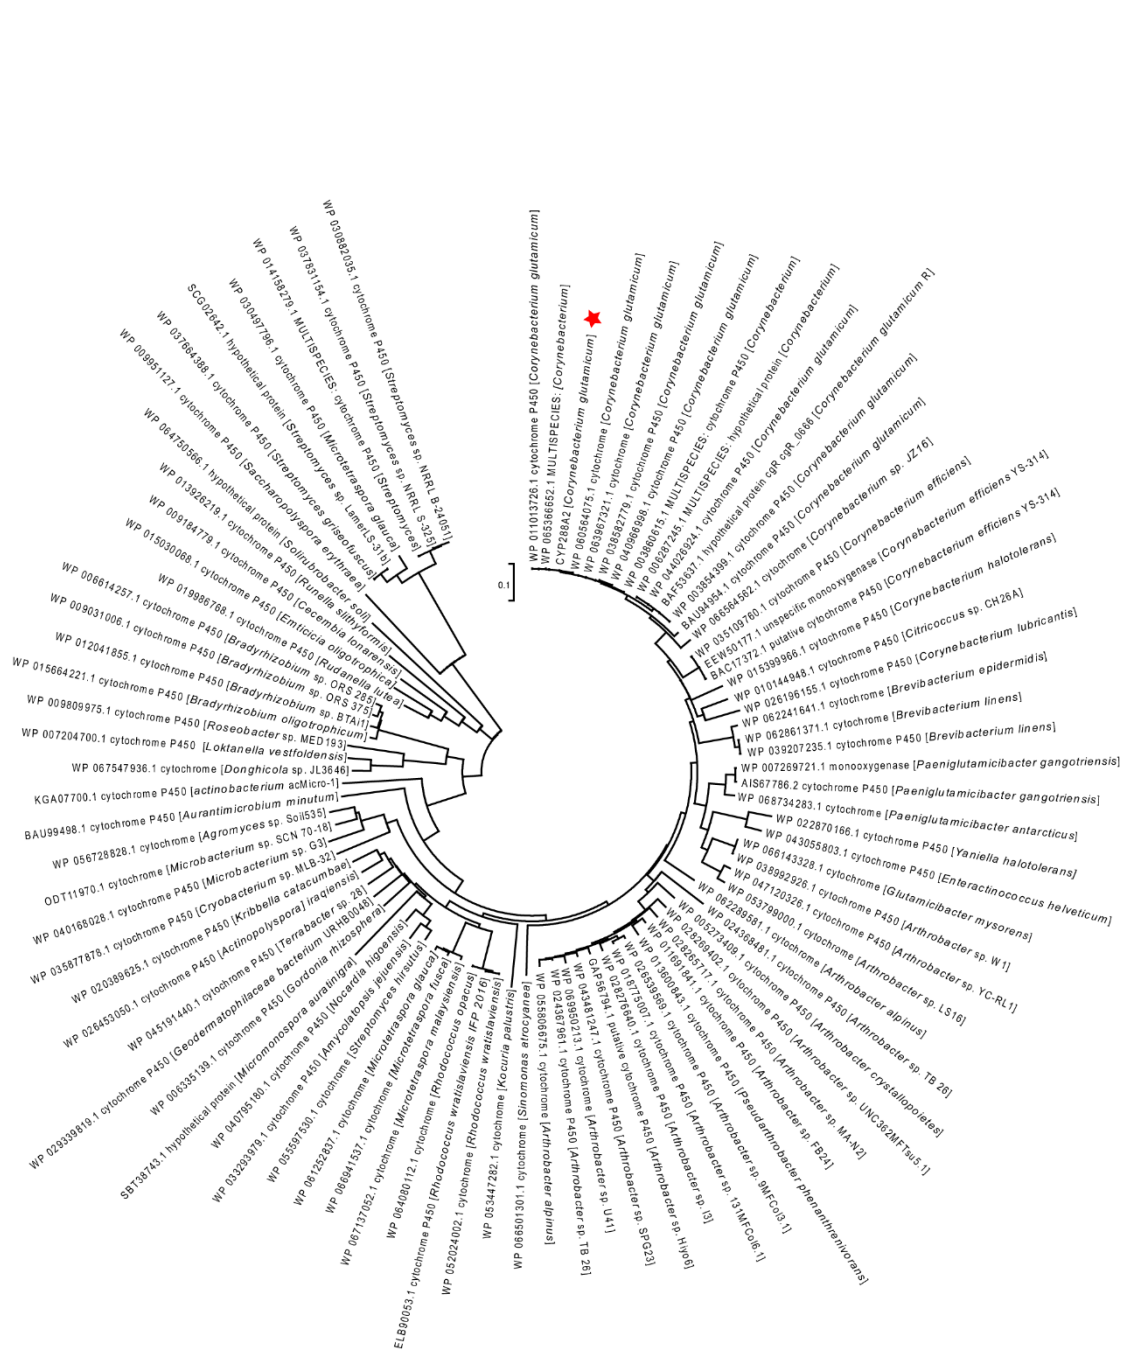

**Fig. S32. Phylogenetic tree of CreJ homologues with > 40% protein sequence identity.**  
 CreJ (*i.e.* CYP288A2) is highlighted with the symbol of star.

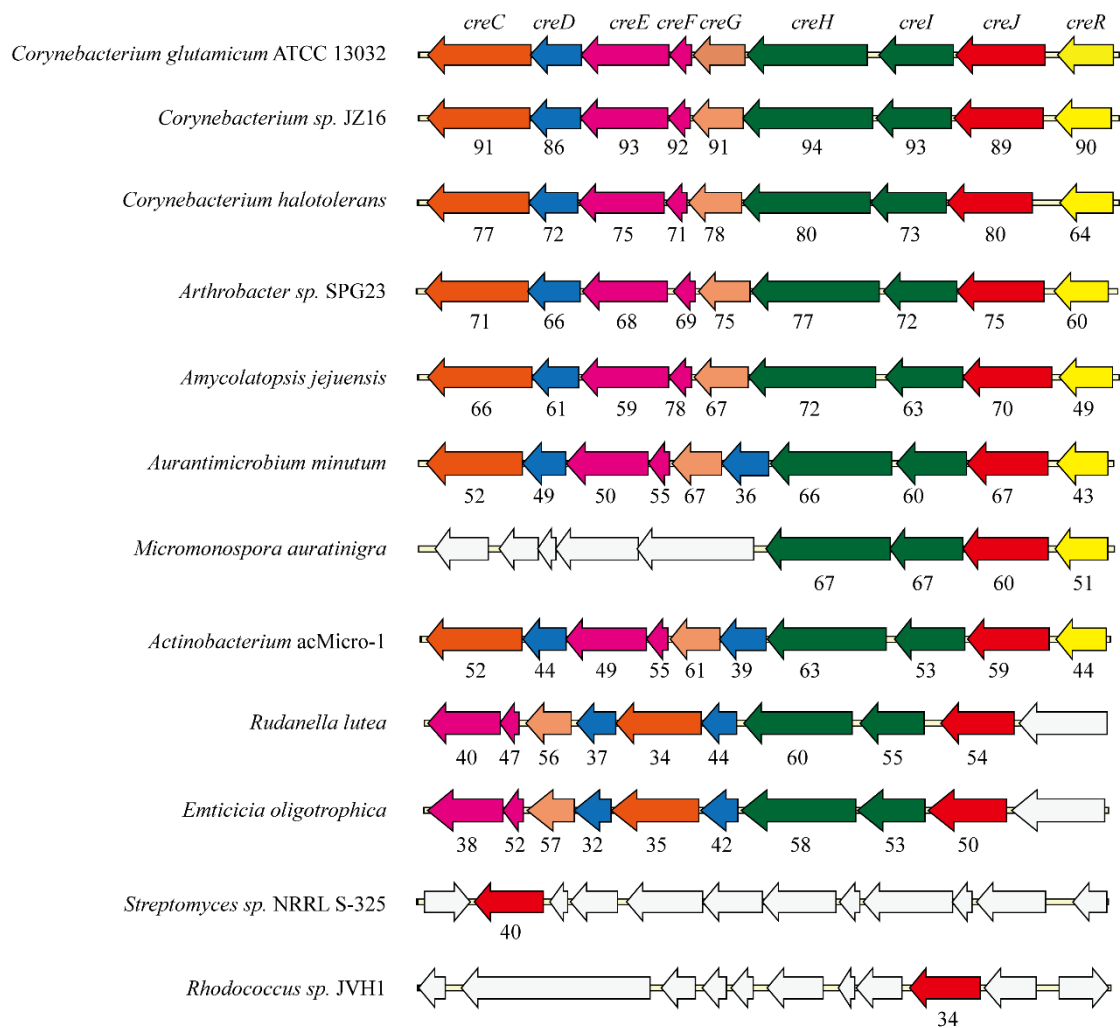

**Fig. S33. Representations of cre-like gene clusters from diverse microorganisms.** Arrows in a same color represent the homologous genes. Genes without colors have no homology to any cre genes. The number below the arrow indicates the percentage of protein sequence identity between the specific gene with its homologous gene in the cre cluster of *C. glutamicum* ATCC13032.

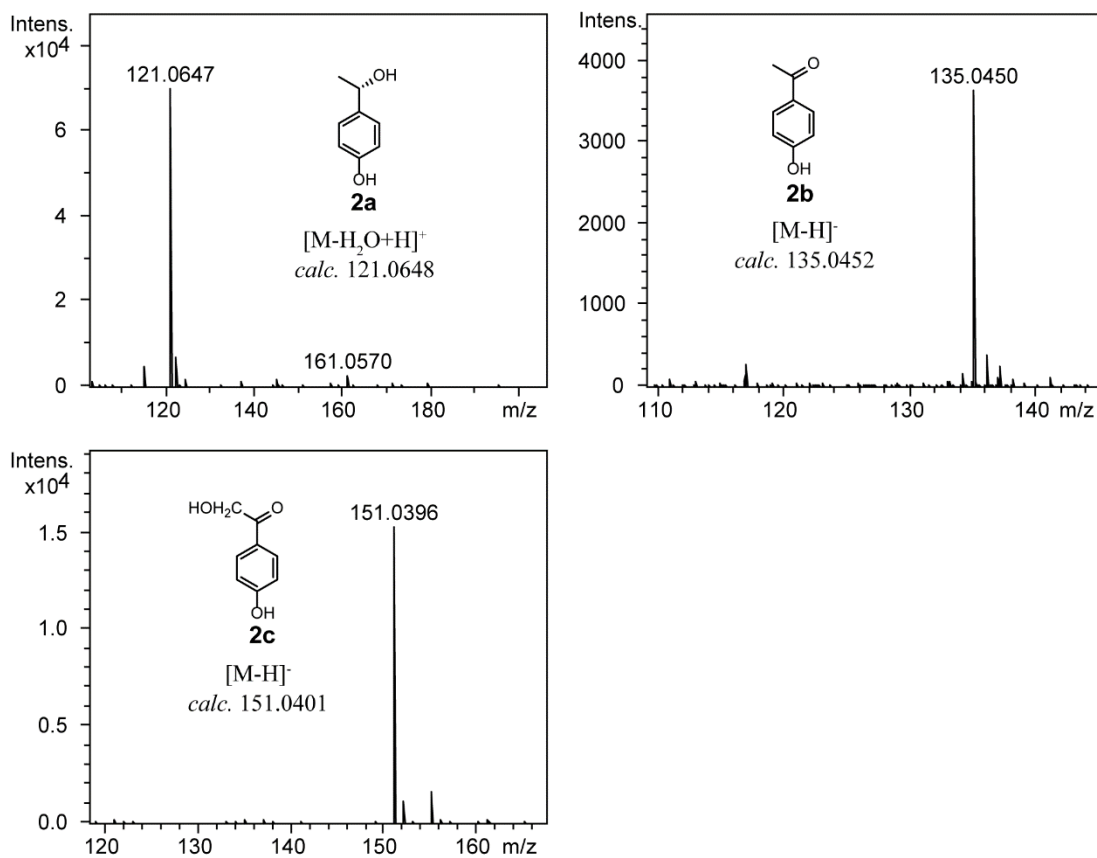

Fig. S34. HRMS spectra of oxidative products from 2.

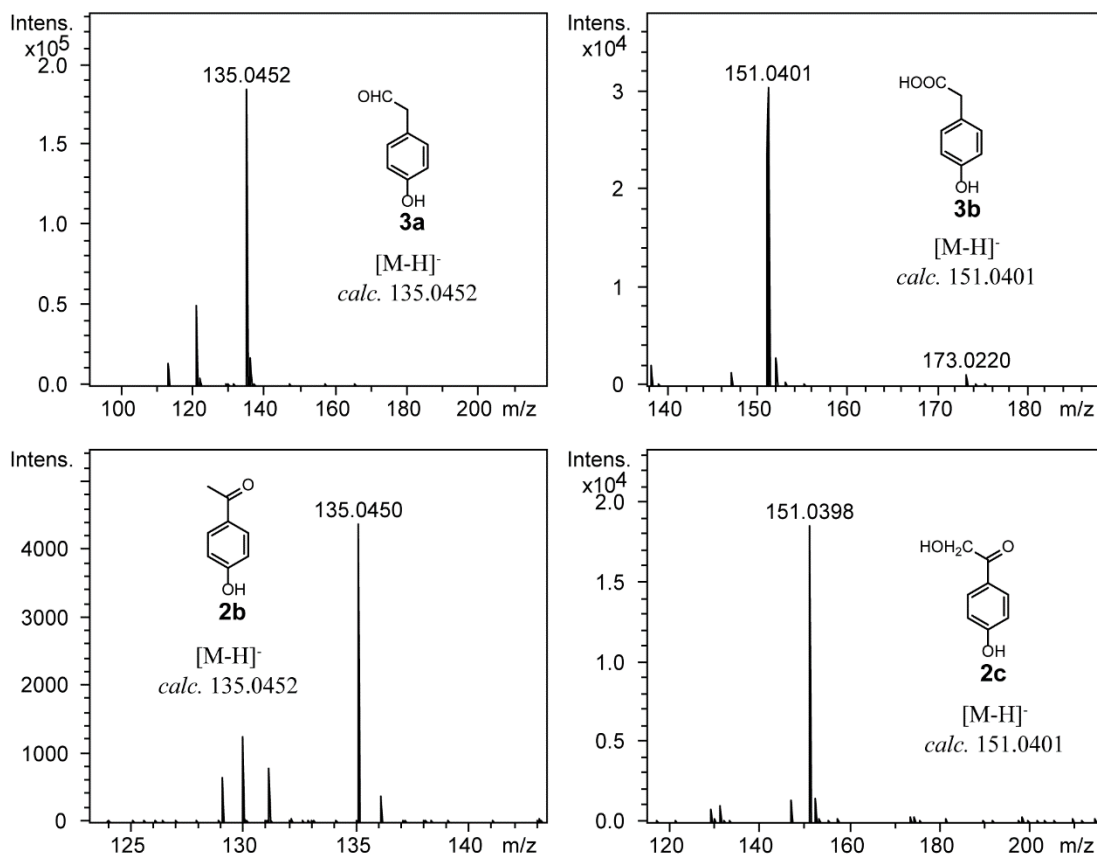

Fig. S35. HRMS spectra of oxidative products from 3.

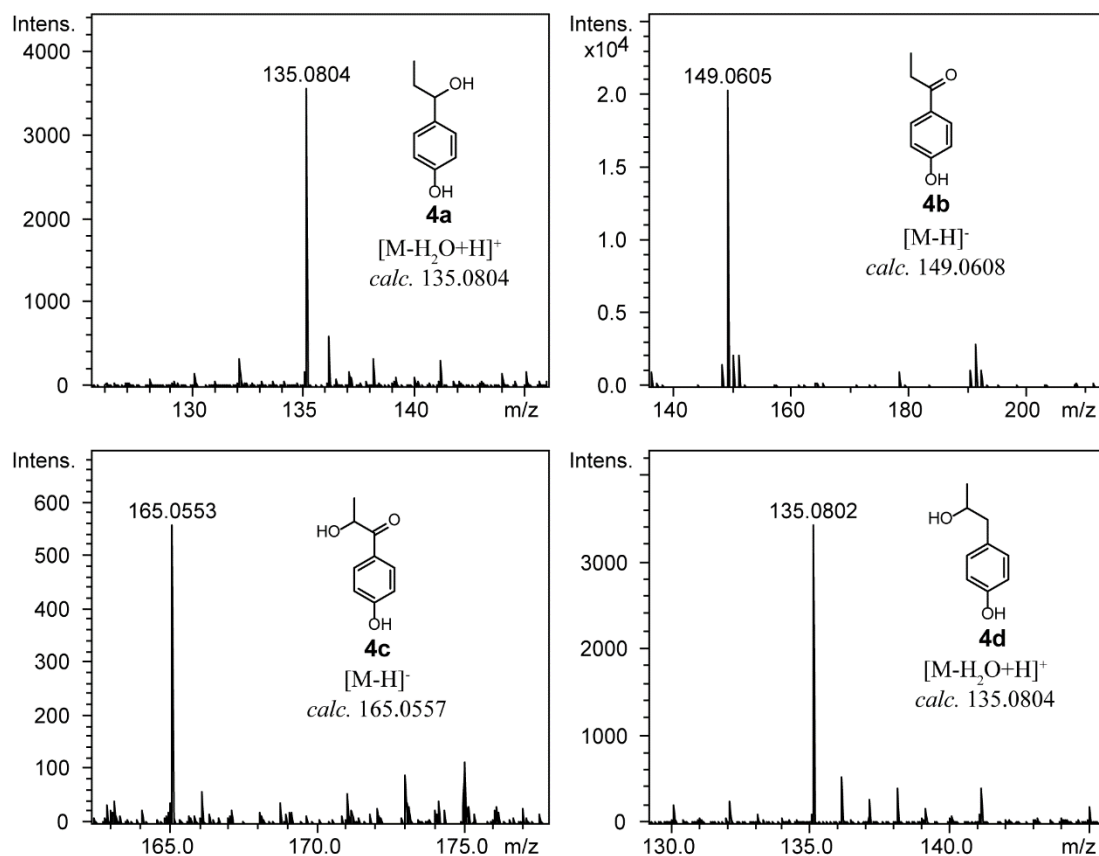

**Fig. S36. HRMS spectra of oxidative products from 4.**

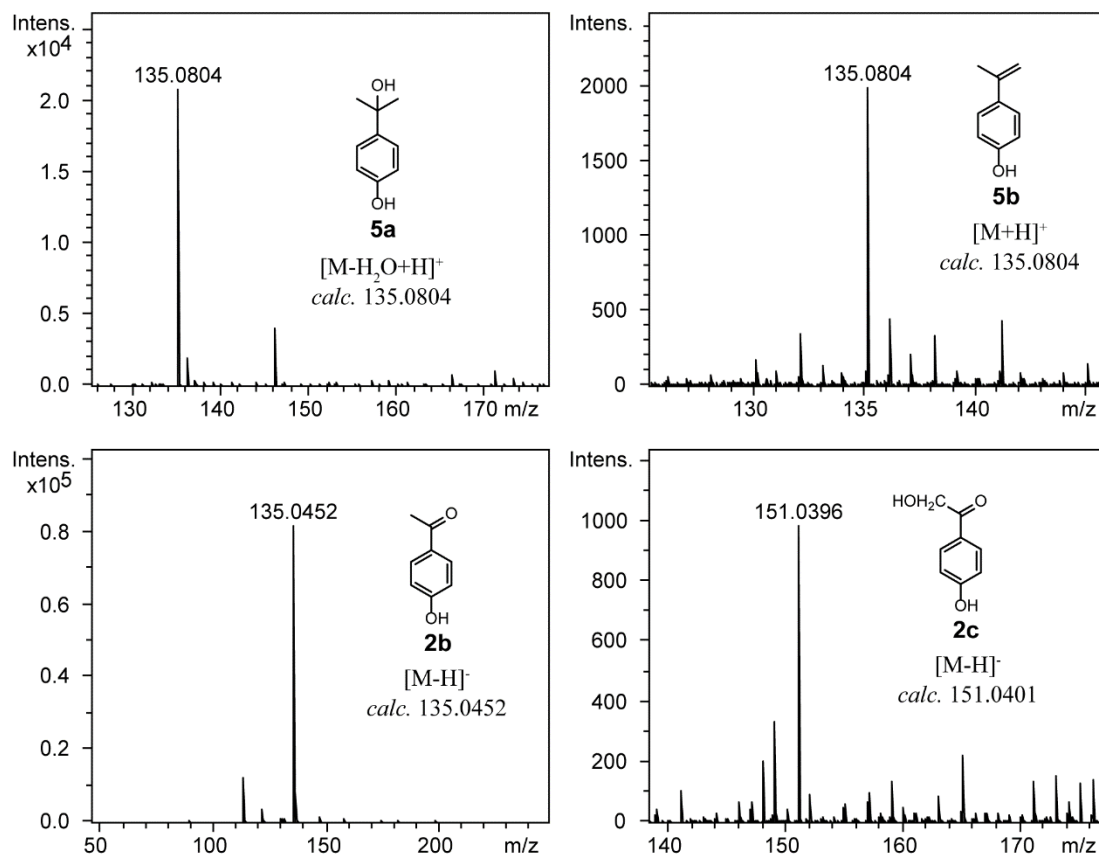

**Fig. S37. HRMS spectra of oxidative products from 5.**

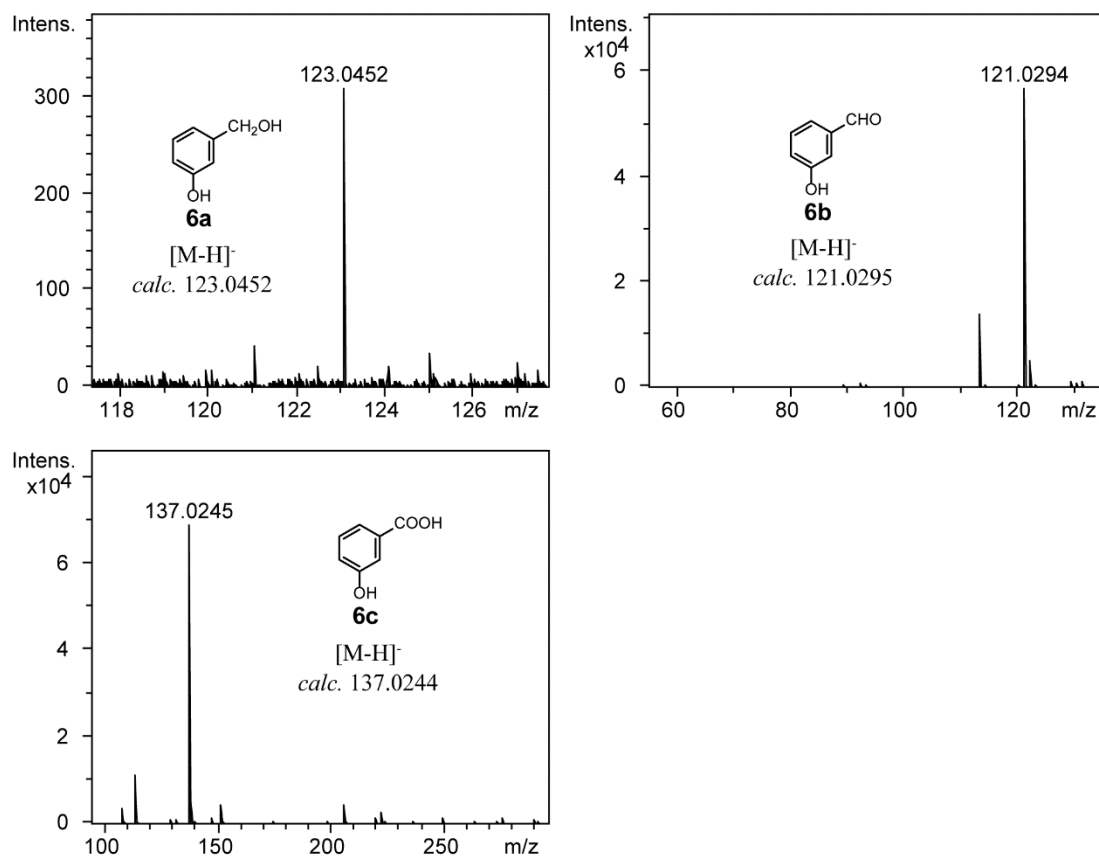

Fig. S38. HRMS spectra of oxidative products from 6.

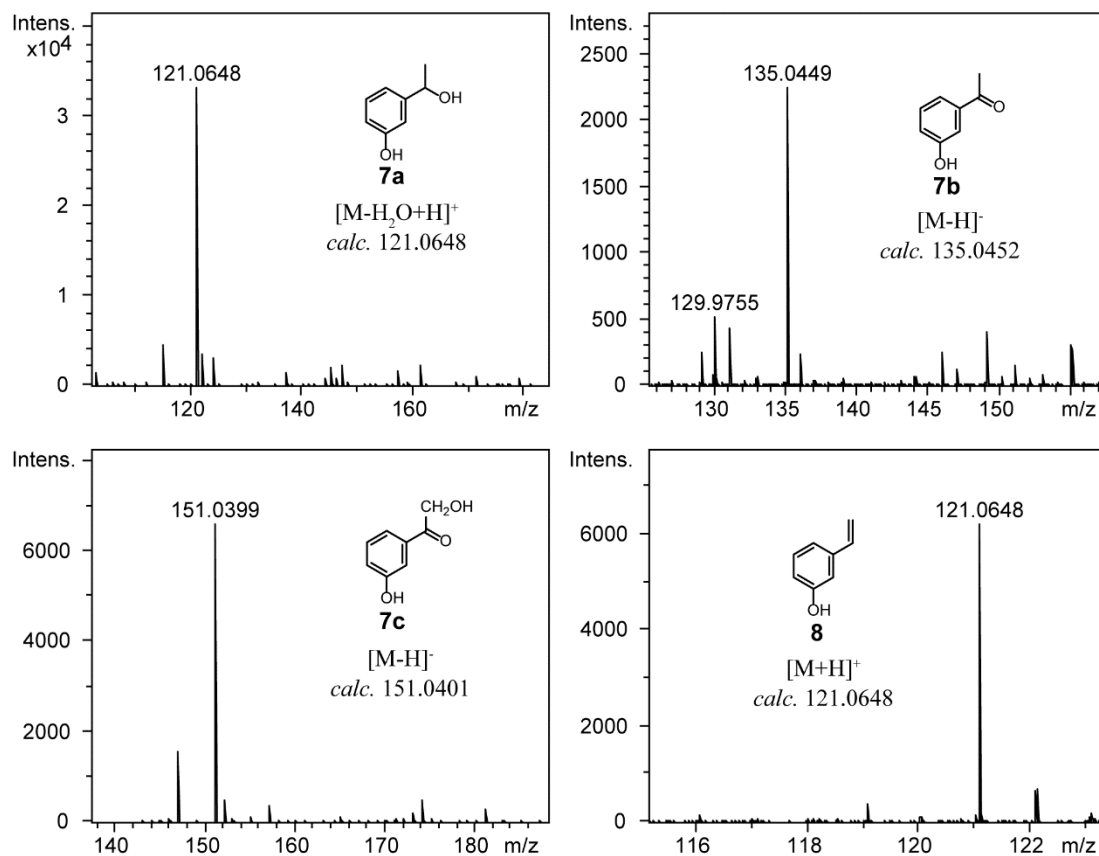

Fig. S39. HRMS spectra of oxidative products from 7.

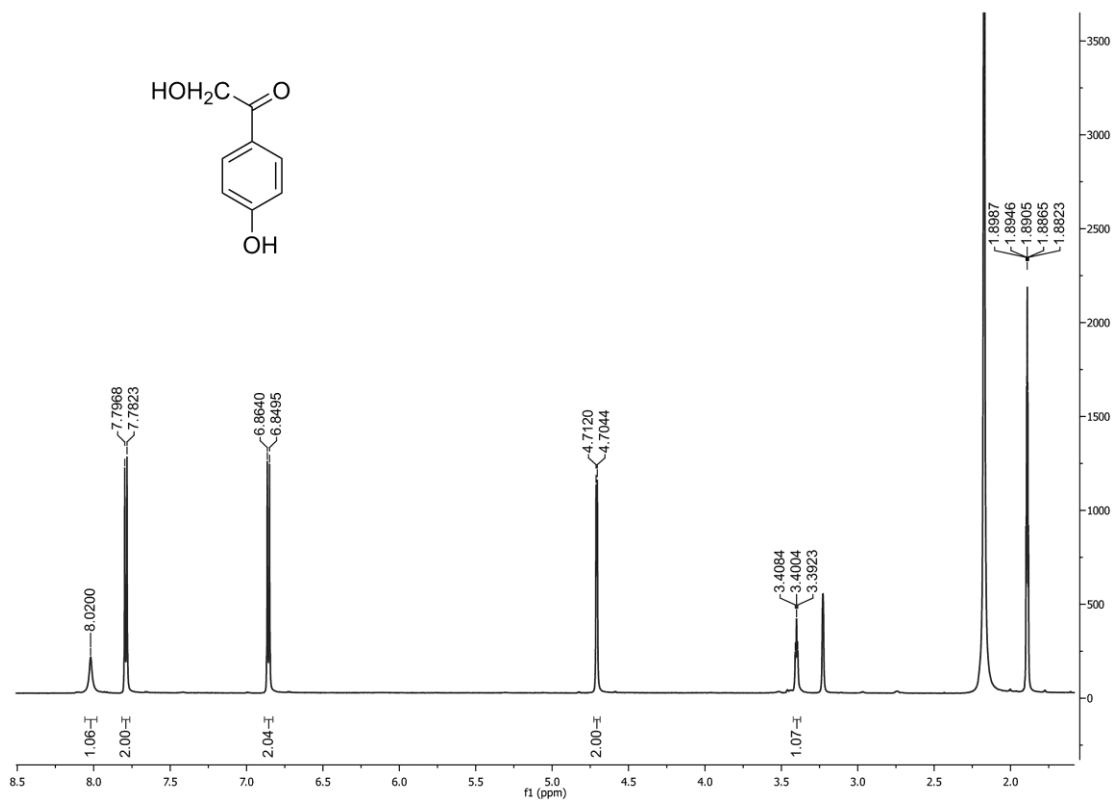

Fig. S40.  $^1\text{H}$  NMR spectrum of 2c in  $\text{CD}_3\text{CN}$ .

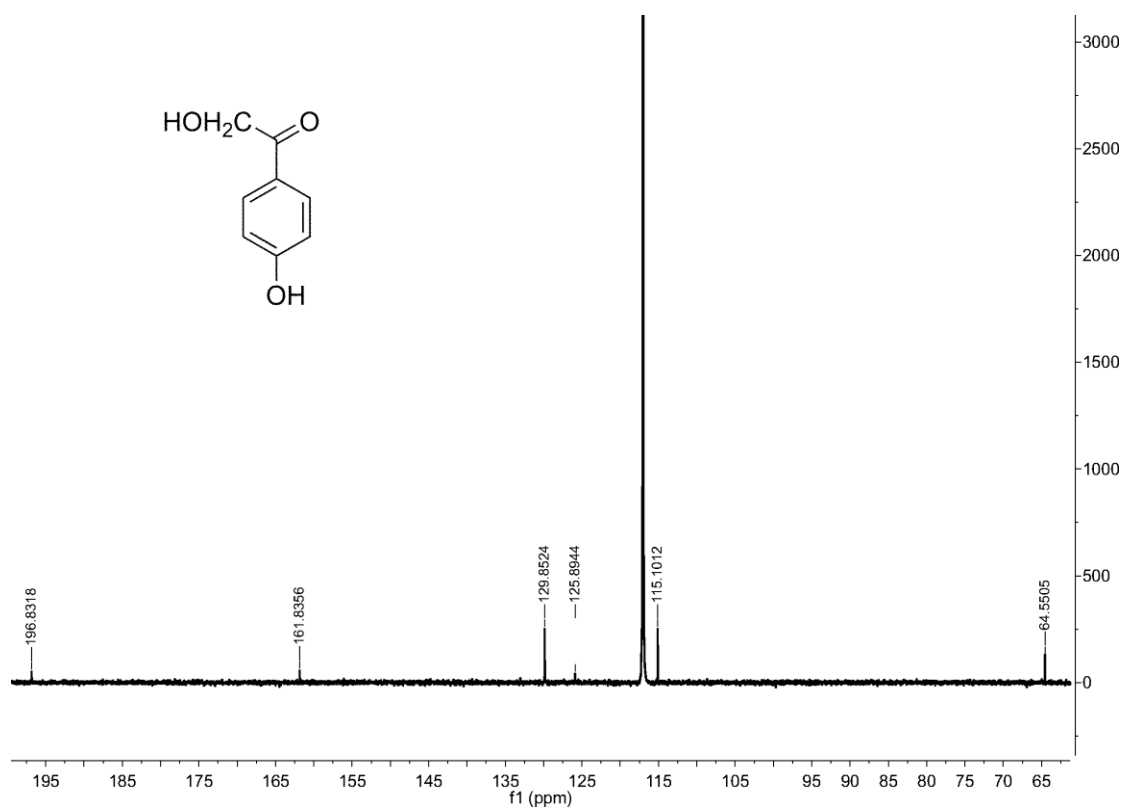

Fig. S41.  $^{13}\text{C}$  NMR spectrum of 2c in  $\text{CD}_3\text{CN}$ .

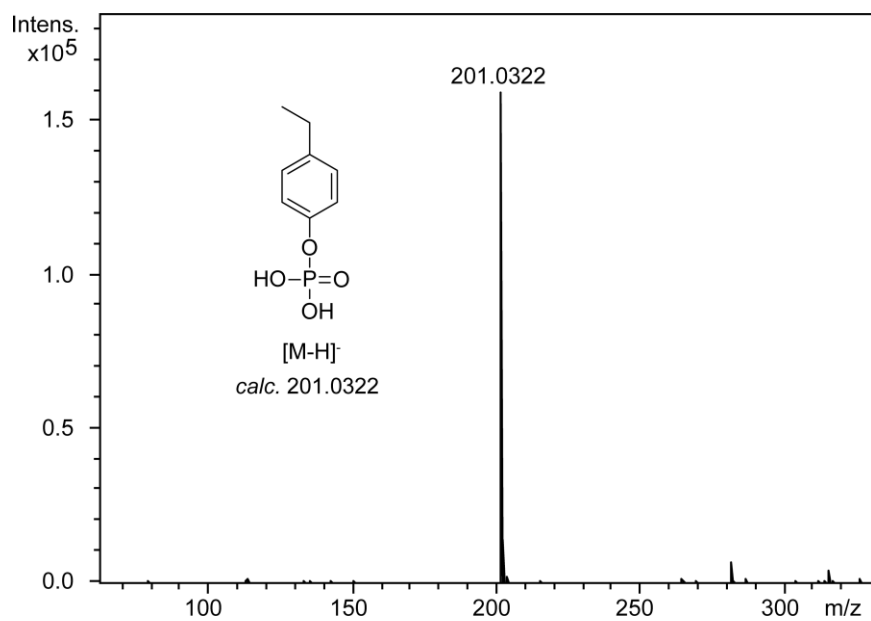

Fig. S42. HRMS of 2'.

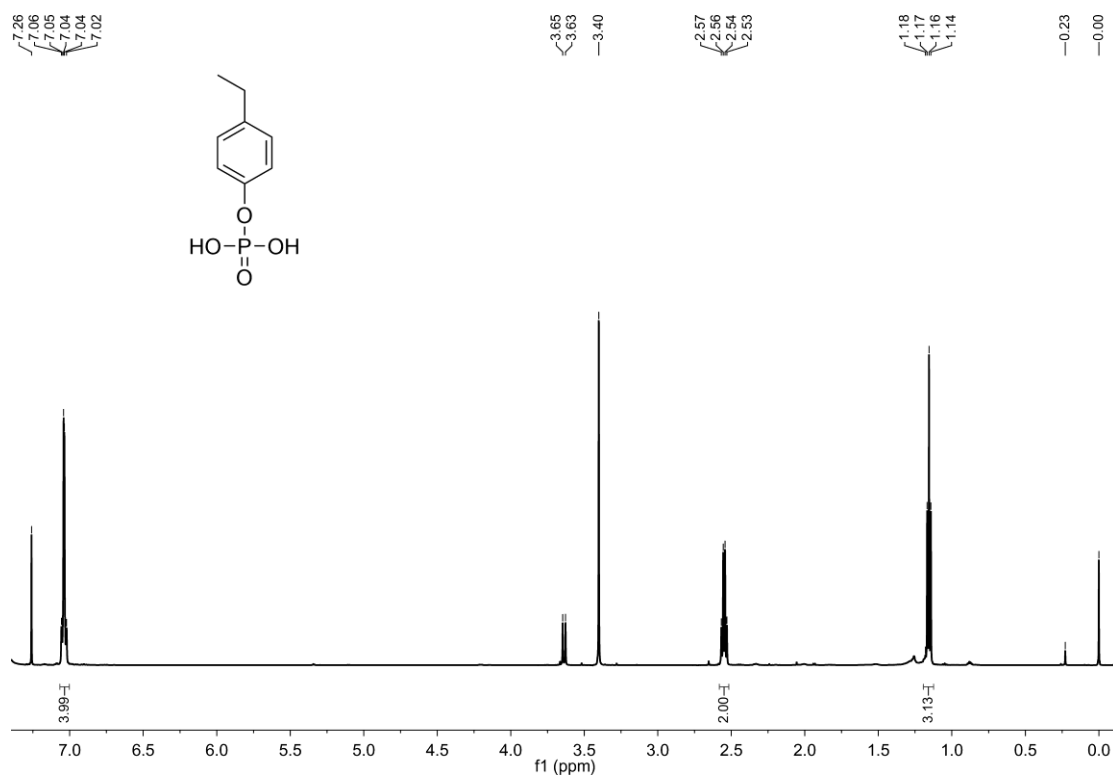

Fig. S43. <sup>1</sup>H NMR spectrum of 2' in CD<sub>3</sub>CN.



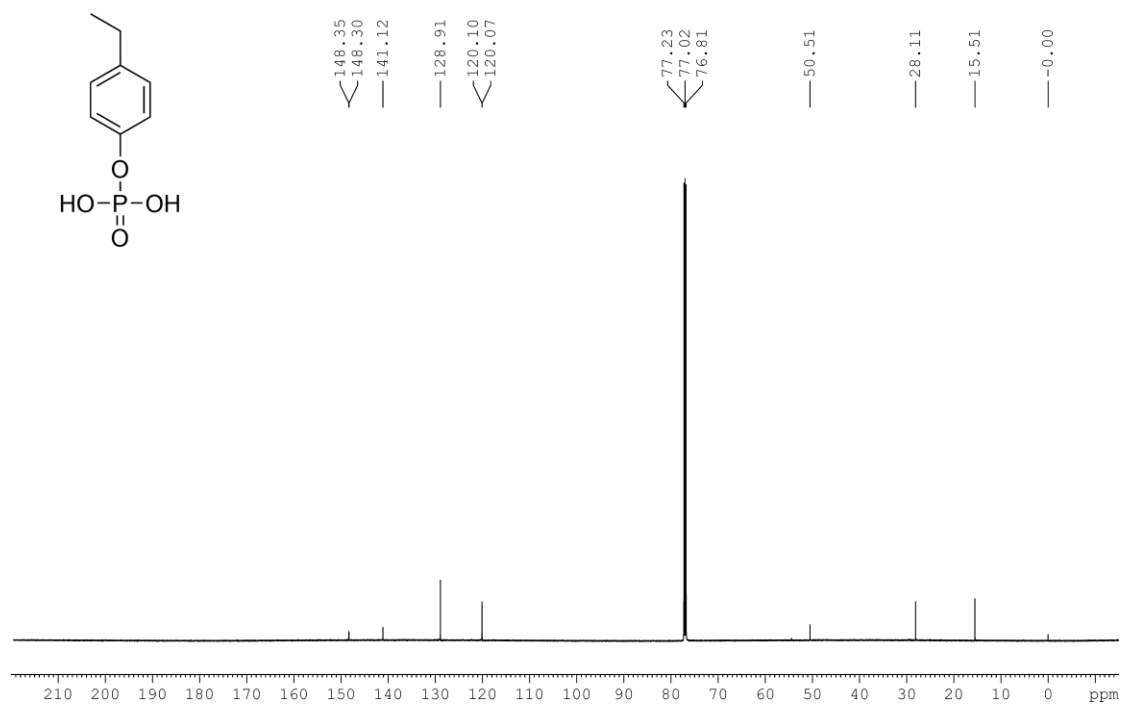

Fig. S44.  $^{13}\text{C}$  NMR spectrum of 2' in  $\text{CD}_3\text{CN}$ .

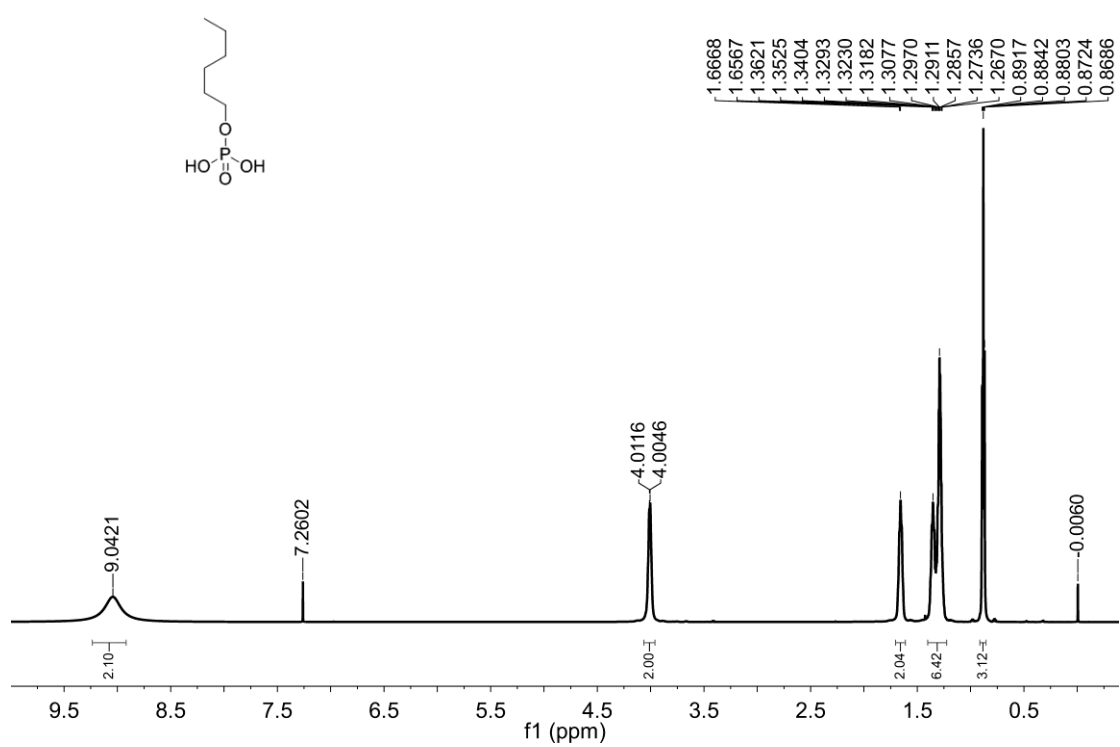

Fig. S45.  $^1\text{H}$  NMR spectrum of 11' in  $\text{CDCl}_3$ .

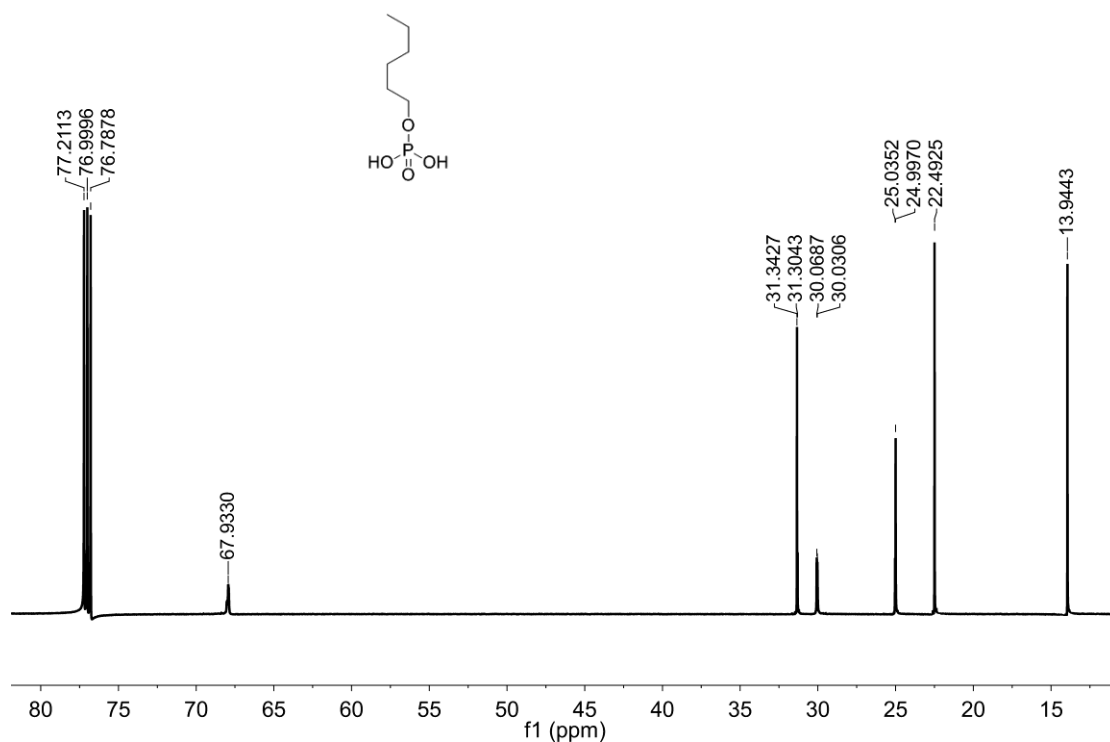

Fig. S46. <sup>13</sup>C NMR spectrum of 11' in CDCl<sub>3</sub>.

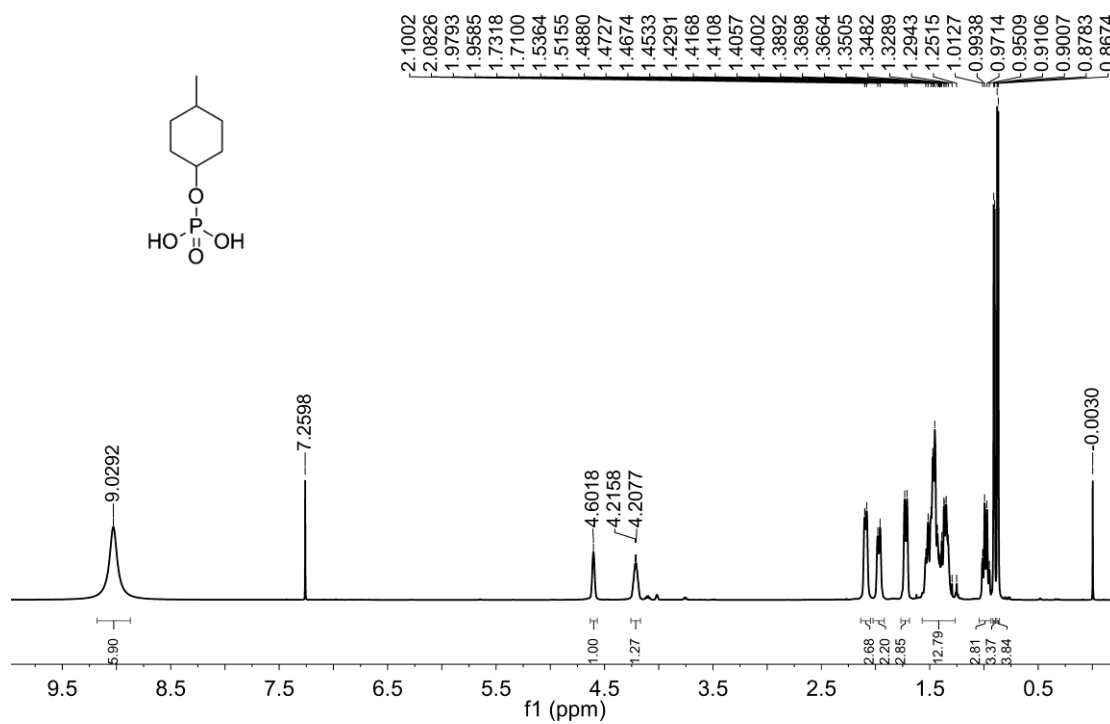

Fig. S47. <sup>1</sup>H NMR spectrum of 12' in CDCl<sub>3</sub>.

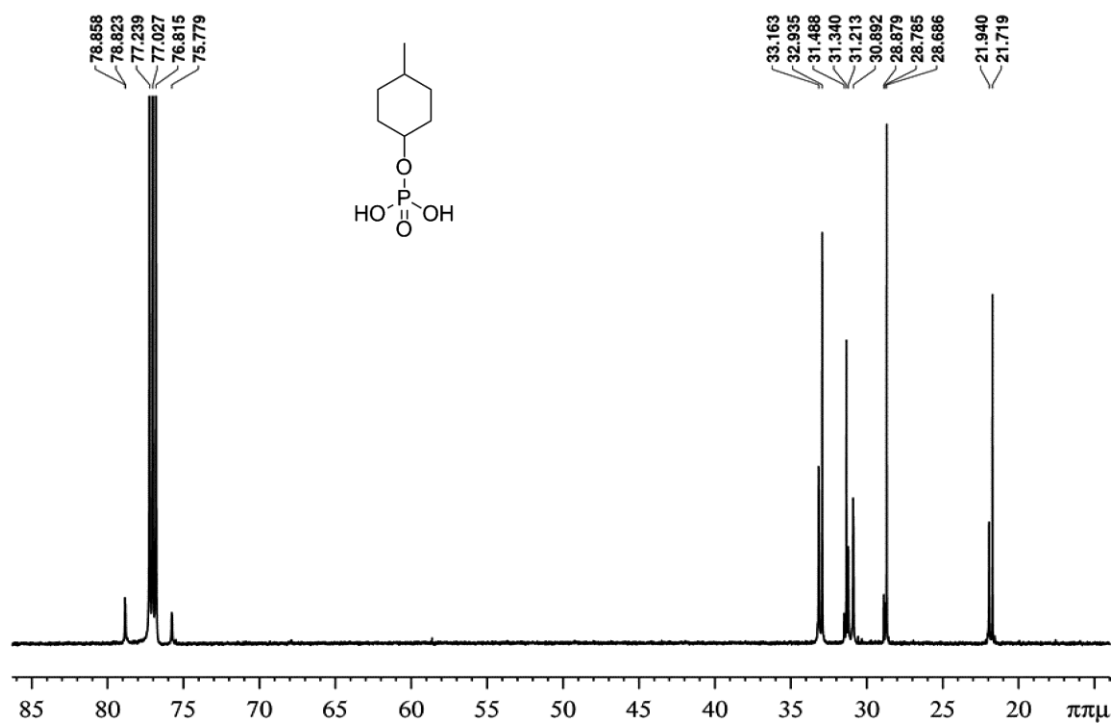

Fig. S48.  $^{13}\text{C}$  NMR spectrum of 12' in  $\text{CDCl}_3$ .

## References

1. Anzai Y, *et al.* (2008) Functional Analysis of MycCI and MycG, Cytochrome P450 Enzymes Involved in Biosynthesis of Mycinamicin Macrolide Antibiotics. *Chem Biol* 15(9):950-959.
2. Green MR & Sambrook J (2012) *Molecular Cloning: A Laboratory Manual (Fourth Edition)* (Cold Spring Harbor Laboratory Press, Cold Spring Harbor, New York).
3. Liu Y, *et al.* (2014) Hydrogen peroxide-independent production of alpha-alkenes by OleTJE P450 fatty acid decarboxylase. *Biotechnol Biofuels* 7(1):28.
4. Bradford MM (1976) A rapid and sensitive method for the quantitation of microgram quantities of protein utilizing the principle of protein-dye binding. *Anal Biochem* 72:248-254.
5. Omura T & Sato R (1964) The carbon monoxide-binding pigment of liver microsomes. ii. solubilization, purification, and properties. *J Biol Chem* 239:2379-2385.
6. Li S, Ouellet H, Sherman DH, & Podust LM (2009) Analysis of transient and catalytic desosamine-binding pockets in cytochrome P-450 PikC from *Streptomyces venezuelae*. *J Biol Chem* 284(9):5723-5730.
7. Bai Z, *et al.* (2014) New chitosan-di(aryl carbamate)-(amide) prepared by dissolving chitosan in aqueous solution of organic acid, reacting, dissolving N-acylated chitosan in lithium chloride, adding phenyl isocyanate to N,N-dimethylacetamide, and reacting. Chinese patent CN104311700-A.
8. Du L, *et al.* (2016) Characterization of a Unique Pathway for 4-Cresol Catabolism Initiated by Phosphorylation in *Corynebacterium glutamicum*. *J Biol Chem* 291(12):6583-6594.
9. McKenna CE, Higa MT, Cheung NH, & McKenna M-C (1977) The facile dealkylation of phosphonic acid dialkyl esters by bromotrimethylsilane. *Tetrahedron Lett* 2:155-158.
10. Kenner GW & Williams NR (1955) A method of reducing phenols to aromatic hydrocarbons. *J Chem Soc*:522-525.
11. Romsted LS & Yoon CO (1993) Counterion affinity orders in aqueous micellar solutions of sodium decyl phosphate and sodium dodecyl sulfate determined by changes in sodium-23 NMR relaxation rates: a surprising dependence on head group charge. *J Am Chem Soc* 115(3):989-994.
12. Montgomery HAC & Turnbull JH (1958) 399. Phosphoramidic halides: phosphorylating agents derived from morpholine. *J Chem Soc* (0):1963-1967.
13. Ortiz de Montellano PR (2015) *Cytochrome P450: Structure, Mechanism, and Biochemistry* (Springer) 4th Ed.
